# Supplementary material for: A rapid and efficient synthetic route to terminal arylacetylenes by tetrabutylammonium hydroxide- and methanol-catalyzed cleavage of 4-aryl-2-methyl-3-butyn-2-ols
Source: publisher site journal article supplement (doi:10.3762/bjoc.7.55), 2011-04-13
Supplement: Additional file 1 [file 1860-5397-7-55-S1.pdf]

# Supporting Information

for

## **A rapid and efficient synthetic route to terminal arylacetylenes by tetrabutylammonium hydroxide- and methanol-catalyzed cleavage of 4-aryl-2-methyl-3-butyn-2-ols**

Jie Li and Pengcheng Huang\*

Address: Department of Polymer Materials and Composites, School of Materials Science and Engineering, Beihang University, Beijing 100191, China

Email: Jie Li - lijie1159@mse.buaa.edu.cn; Pengcheng Huang\* - huangpc@buaa.edu.cn

\* Corresponding author

**General experimental methods, analytical data,  $^1\text{H}$  and  $^{13}\text{C}$  NMR spectra of compounds 1a–k and 2a–k.**

## **Experimental procedures and characterization data for the products:**

### **General methods**

Unless otherwise stated, all starting materials were obtained from commercial suppliers and were used without further purification. 4-Aryl-2-methyl-3-butyn-2-ols were prepared according to the general procedure. Toluene and triethylamine were distilled from  $\text{CaH}_2$  prior to use. All reactions were performed under an atmosphere of nitrogen. Melting points were taken on a hot-plate microscope apparatus and are uncorrected.  $^1\text{H}$  (300 MHz) and  $^{13}\text{C}$  (75 MHz) NMR spectra were acquired on a Bruker AV 300 NMR spectrometer.

### **General procedure for the synthesis of 4-aryl-2-methyl-3-butyn-2-ols**

A mixture of aryl bromide (5.0 mmol), 2-methyl-3-butyn-2-ol (1.0 mol per 1 mol bromine atom), copper(I) iodide (38.2 mg, 0.2 mmol), palladium(II) dichlorobis(triphenylphosphine) (70.2 mg, 0.1 mmol) and triphenylphosphine (104.9 mg, 0.4 mmol) in triethylamine (25 mL) was placed in a Schlenk flask. The mixture was heated at 65 °C for 6 h. After cooling to room temperature, the solvent was removed under reduced pressure. The residue was dissolved in dichloromethane and the organic phase was washed successively with 5% HCl and brine, dried over  $\text{MgSO}_4$ , and then evaporated. The crude product was purified by column chromatography with petroleum ether–ethyl acetate mixtures as eluent.

**General procedure for the synthesis of 2i and 2k using sodium in refluxing toluene**

4-Aryl-2-methyl-3-butyn-2-ol (2 mmol) and Na (2 mol per 1 mol 2-hydroxypropyl group) were dissolved in toluene (100 mL). The mixture was stirred at 120 °C for 8 h. After cooling to room temperature, the solution was washed successively with 5% HCl and brine, dried over MgSO<sub>4</sub>, and concentrated in vacuo. The crude product was then purified by column chromatography to afford the product.

**Characterization data of 1a–k and 2a–k**

**4-(4-(Phenylethynyl)phenyl)-2-methyl-3-butyn-2-ol (1a):** eluent, petroleum ether–ethyl acetate = 10/1; yield: 81%; white solid; mp 135.2–135.7 °C; <sup>1</sup>H NMR (CDCl<sub>3</sub>) δ 7.46–7.53 (m, 4H), 7.34–7.40 (m, 5H), 1.78 (s, 1H), 1.63 (s, 6H); <sup>13</sup>C NMR (CDCl<sub>3</sub>) δ 31.45, 65.66, 81.87, 88.98, 91.12, 95.51, 122.58, 123.04, 123.19, 128.38, 128.46, 131.44, 131.59, 131.63.

**4-(3-Nitrophenyl)-2-methyl-3-butyn-2-ol (1b):** CAS NO.: 33432-52-9; eluent, petroleum ether–ethyl acetate = 5/1; yield: 90%; white solid; mp 51.7–52.2 °C; <sup>1</sup>H NMR (CDCl<sub>3</sub>) δ 8.28 (t, *J* = 2 Hz, 1H), 8.17 (d, *J* = 8.4 Hz, 1H), 7.73 (d, *J* = 7.6 Hz, 1H), 7.50 (t, *J* = 8 Hz, 1H), 1.83 (s, 1H), 1.65 (s, 6H); <sup>13</sup>C NMR (CDCl<sub>3</sub>) δ 31.29, 65.56, 79.84, 96.46, 122.95, 124.63, 126.47, 129.28, 137.29, 148.18.

**4-(3-Bromo-5-nitrophenyl)-2-methyl-3-butyn-2-ol (1c):** eluent, petroleum ether–ethyl acetate = 5/1; yield: 68%; white solid; mp 68.2–68.8 °C; <sup>1</sup>H NMR (CDCl<sub>3</sub>) δ 8.28 (t, *J* = 1.8 Hz, 1H), 8.17 (t, *J* = 1.8 Hz, 1H), 7.85 (t, *J* = 1.8 Hz, 1H), 2.32 (s, 1H), 1.63 (s, 6H); <sup>13</sup>C NMR (CDCl<sub>3</sub>) δ 31.20, 65.54, 78.65, 97.95, 122.59, 125.10, 126.14, 126.18, 139.93, 148.58.

**4-(3-(Phenylethynyl)phenyl)-2-methyl-3-butyn-2-ol (1d):** eluent, petroleum ether–ethyl acetate = 6/1; yield: 63%; white solid; mp 67–67.5 °C; <sup>1</sup>H NMR (CDCl<sub>3</sub>) δ 7.62 (s, 1H), 7.46–7.53 (m, 3H), 7.30–7.39 (m, 5H), 1.72 (s, 1H), 1.64 (s, 6H); <sup>13</sup>C NMR (CDCl<sub>3</sub>) δ 31.46, 65.62, 81.39, 88.48, 90.01, 94.39, 123.02, 123.11, 123.58, 128.39, 128.46, 131.31, 131.65, 134.71.

**4-(4-Octyloxyphenyl)-2-methyl-3-butyn-2-ol (1e):** CAS NO.: 125151-57-7; eluent, petroleum ether–ethyl acetate = 10/1; yield: 75%; white solid; mp 63.1–63.2 °C; <sup>1</sup>H NMR (CDCl<sub>3</sub>) δ 7.33 (d, *J* = 9 Hz, 2H), 6.80 (d, *J* = 8.7 Hz, 2H), 3.93 (t, *J* = 6.9 Hz, 2H), 2.12 (s, 1H), 1.72–1.81 (m, 2H), 1.60 (s, 6H), 1.29–1.46 (m, br, 10H), 0.89 (t, *J* = 6.9 Hz, 3H); <sup>13</sup>C NMR (CDCl<sub>3</sub>) δ 14.05, 22.63, 26.00, 29.18, 29.19, 29.32, 31.59, 31.79, 65.65, 68.08, 82.13, 92.32, 114.44, 114.59, 133.04, 159.20.

**4-Phenyl-2-methyl-3-butyn-2-ol (1f):** CAS NO.: 1719-19-3; eluent, petroleum ether–ethyl acetate = 10/1; yield: 82%; white solid; mp 52.4–53 °C; <sup>1</sup>H NMR (CDCl<sub>3</sub>) δ 7.40–7.43 (m, 2H), 7.28–7.30 (m, 3H), 2.07 (s, 1H), 1.62

(s, 6H);  $^{13}\text{C}$  NMR ( $\text{CDCl}_3$ )  $\delta$  31.50, 65.62, 82.25, 93.82, 122.78, 128.24, 131.65.

**4-(4-Bromophenyl)-2-methyl-3-butyn-2-ol (1g):** CAS NO.: 76347-62-1; eluent, petroleum ether–ethyl acetate = 6/1; yield: 62%; white solid; mp 59.5–61 °C;  $^1\text{H}$  MNR ( $\text{CDCl}_3$ )  $\delta$  7.42 (d,  $J$  = 8.1 Hz, 2H), 7.26 (d,  $J$  = 8.4 Hz, 2H), 2.03 (s, 1H), 1.61 (s, 6H);  $^{13}\text{C}$  NMR ( $\text{CDCl}_3$ )  $\delta$  31.40, 65.62, 81.16, 94.97, 121.74, 122.49, 131.52, 133.09.

**1,3-Bis{3-(3-methyl-3-hydroxy-butynyl)-5-[2-(2-ethoxyethoxy)ethoxy]phenylethynyl}benzene (1h):** golden yellow oil;  $^1\text{H}$  NMR ( $\text{CDCl}_3$ )  $\delta$  7.64 (s, 1H), 7.44 (d,  $J$  = 7.5 Hz, 2H), 7.30 (t,  $J$  = 7.5 Hz, 1H), 7.18 (s, 2H), 7.00 (s, 2H), 6.93 (s, 2H), 4.08–4.13 (m, 4H), 3.84 (t,  $J$  = 4.6 Hz, 4H), 3.70 (t,  $J$  = 4.6 Hz, 4H), 3.59 (t,  $J$  = 4.6 Hz, 4H), 3.52 (q,  $J$  = 6.9 Hz, 4H), 2.02 (s, 2H), 1.59 (s, 12H), 1.17–1.22 (m, 6H);  $^{13}\text{C}$  NMR ( $\text{CDCl}_3$ )  $\delta$  15.14, 31.43, 65.52, 66.70, 67.81, 69.59, 69.86, 70.97, 81.25, 88.77, 89.15, 94.32, 117.95, 118.21, 123.38, 124.08, 124.14, 127.65, 128.54, 131.50, 134.68, 158.46.

**1-Ethynyl-3,5-bis[(2-hydroxyprop-2-yl)ethynyl]benzene (1i):** white solid; mp 129.7–130.3 °C (lit. [1] 95–97 °C);  $^1\text{H}$  MNR ( $\text{CDCl}_3$ )  $\delta$  7.42–7.44 (m, 3H), 3.06 (s, 1H), 1.82 (s, 2H), 1.56 (s, 12H);  $^{13}\text{C}$  NMR ( $\text{CDCl}_3$ )  $\delta$  31.36, 65.54, 78.30, 80.43, 81.89, 95.10, 122.72, 123.44, 134.63, 134.82.

**1,3,5-Tris[(2-hydroxyprop-2-yl)ethynyl]benzene (1j):** eluent, petroleum ether–ethyl acetate = 1/1; yield: 89%; white solid; mp 169–170 °C (lit. [1] 170–

172 °C); <sup>1</sup>H MNR (CDCl<sub>3</sub>) δ 7.40 (s, 3H), 1.59 (s, 21H); <sup>13</sup>C NMR (CDCl<sub>3</sub>) δ 31.37, 65.54, 80.55, 94.93, 123.34, 134.23.

**3-Cascade:benzene[3-1,3,5]:5-ethynyl-1,3-bis-[(2-hydroxyprop-2-yl)ethynyl]benzene (1k):** white solid; mp >300 °C (decompose); <sup>1</sup>H MNR (DMSO-*d*<sub>6</sub>) δ 7.83 (s, 3H), 7.54 (d, *J* = 1.5 Hz, 6H), 7.40 (s, 3H), 5.53 (s, 6H), 1.47 (s, 36H); <sup>13</sup>C NMR (DMSO-*d*<sub>6</sub>) δ 31.39, 63.61, 78.48, 88.59, 89.09, 97.88, 122.91, 123.25, 123.91, 133.33, 134.04, 134.45.

**1-Ethynyl-4-(phenylethynyl)benzene (2a):** CAS NO.: 92866-00-7; eluent, petroleum ether; yield: 97.6%; white solid; mp 91.6–92.1 °C; <sup>1</sup>H MNR (CDCl<sub>3</sub>) δ 7.48–7.54 (m, 6H), 7.35–7.36 (m, 3H), 3.17 (s, 1H); <sup>13</sup>C NMR (CDCl<sub>3</sub>) δ 78.86, 83.30, 88.84, 91.40, 121.90, 122.99, 123.83, 128.40, 128.54, 131.48, 131.66, 132.08.

**1-Ethynyl-3-nitrobenzene (2b):** CAS NO.: 3034-94-4; eluent, petroleum ether; yield: 88.2%; yellow oil; <sup>1</sup>H MNR (CDCl<sub>3</sub>) δ 8.27 (t, *J* = 1.8 Hz, 1H), 8.14 (d, *J* = 8.3 Hz, 1H), 7.72 (d, *J* = 7.7 Hz, 1H), 7.45 (t, *J* = 8 Hz, 1H), 3.15 (s, 1H); <sup>13</sup>C NMR (CDCl<sub>3</sub>) δ 79.90, 81.10, 123.57, 123.95, 126.99, 129.39, 137.77, 148.20.

**1-Ethynyl-3-bromo-5-nitrobenzene (2c):** eluent, petroleum ether–ethyl acetate= 20/1; yield: 85.1%; yellow solid; mp 77.4–77.9 °C; <sup>1</sup>H MNR (CDCl<sub>3</sub>) δ 8.35 (s, 1H), 8.26 (s, 1H), 7.92 (s, 1H), 3.28 (s, 1H); <sup>13</sup>C NMR (CDCl<sub>3</sub>) δ 79.81, 81.37, 122.70, 125.43, 125.62, 126.86, 140.39, 148.61.

**1-Ethynyl-3-(phenylethynyl)benzene (2d):** eluent, petroleum ether; yield: 88.9%; colorless oil;  $^1\text{H}$  MNR ( $\text{CDCl}_3$ )  $\delta$  7.68 (s, 1H), 7.45–7.54 (m, 4H), 7.30–7.37 (m, 4H), 3.11 (s, 1H);  $^{13}\text{C}$  NMR ( $\text{CDCl}_3$ )  $\delta$  77.79, 82.82, 88.35, 90.25, 122.53, 122.99, 123.72, 128.41, 128.44, 128.51, 131.69, 131.80, 131.86, 135.13.

**1-Ethynyl-4-octyloxybenzene (2e):** CAS NO.: 79887-19-7; eluent, petroleum ether; yield: 95.3%; colorless oil;  $^1\text{H}$  MNR ( $\text{CDCl}_3$ )  $\delta$  7.43 (d,  $J = 8.6$  Hz, 2H), 6.84 (d,  $J = 8.6$  Hz, 2H), 3.97 (t,  $J = 6.5$  Hz, 2H), 3.01 (s, 1H), 1.76–1.83 (m, 2H), 1.30–1.47 (m, br, 10H), 0.90 (t,  $J = 6.2$  Hz, 3H);  $^{13}\text{C}$  NMR ( $\text{CDCl}_3$ )  $\delta$  14.07, 22.64, 26.01, 29.17, 29.22, 29.33, 31.80, 68.09, 75.63, 83.79, 113.94, 114.49, 133.56, 159.59.

**Ethynylbenzene (2f):** CAS NO.: 536-74-3; eluent, petroleum ether; yield: 88%; colorless oil;  $^1\text{H}$  MNR ( $\text{CDCl}_3$ )  $\delta$  7.48–7.50 (m, 2H), 7.30–7.32 (m, 3H), 3.06 (s, 1H);  $^{13}\text{C}$  NMR ( $\text{CDCl}_3$ )  $\delta$  77.48, 83.69, 122.18, 128.33, 128.81, 132.17.

**4-Bromophenylacetylene (2g):** CAS NO.: 766-96-1; eluent, petroleum ether; yield: 73.6%; white solid; mp 64.1–65 °C;  $^1\text{H}$  MNR ( $\text{CDCl}_3$ )  $\delta$  7.46 (d,  $J = 8.4$  Hz, 2H), 7.36 (d,  $J = 8.4$  Hz, 2H), 3.13 (s, 1H);  $^{13}\text{C}$  NMR ( $\text{CDCl}_3$ )  $\delta$  78.33, 82.60, 121.06, 123.25, 131.61, 133.56.

**1,3-Bis{[3-ethynyl-5-[2-(2-ethoxyethoxy)ethoxy]phenyl]ethynyl}benzene (2h):** eluent, petroleum ether–ethyl acetate= 4/1; yield: 74.4%; pale yellow

viscous oil;  $^1\text{H}$  NMR ( $\text{CDCl}_3$ )  $\delta$  7.61 (s, 1H), 7.41 (d,  $J = 7.8$  Hz, 2H), 7.26–7.19 (m, 3H), 7.00–6.96 (m, 4H), 4.08 (t,  $J = 4.5$  Hz, 4H), 3.80 (t,  $J = 4.8$  Hz, 4H), 3.65 (t,  $J = 4.8$  Hz, 4H), 3.55 (t,  $J = 4.8$  Hz, 4H), 3.47 (q,  $J = 6.9$  Hz, 4H), 3.01 (s, 2H), 1.15 (t,  $J = 6.9$  Hz, 6H);  $^{13}\text{C}$  NMR ( $\text{CDCl}_3$ )  $\delta$  15.16, 66.71, 67.81, 69.58, 69.87, 70.98, 77.68, 82.67, 88.89, 89.02, 118.40, 118.75, 123.32, 123.42, 124.25, 128.03, 128.57, 131.58, 134.70, 158.48.

**1,3,5-Triethynylbenzene (2i)**: CAS NO.: 7567-63-7; eluent, petroleum ether; white solid; mp 106–107.2 °C;  $^1\text{H}$  NMR ( $\text{CDCl}_3$ )  $\delta$  7.57 (s, 3H), 3.10 (s, 3H);  $^{13}\text{C}$  NMR ( $\text{CDCl}_3$ )  $\delta$  78.67, 81.63, 122.96, 135.65.

**1,3,5-Tris[2-(3,5-diethynylphenyl)ethynyl]benzene (2k)**: eluent, THF. The product was further purified by precipitation of a THF solution into 20 volumes of methanol to give **2k** as a white fluffy solid. Yield: 82.6%;  $^1\text{H}$  NMR ( $\text{DMSO}-d_6$ ):  $\delta$  7.62–7.84 (m, 12H), 4.39(s, 6H);  $^{13}\text{C}$  NMR ( $\text{DMSO}-d_6$ )  $\delta$  81.31, 82.68, 88.76, 88.85, 123.00, 123.10, 134.49, 134.60, 134.91.

## References

1. Rodríguez, J. G.; Esquivias, J. *Tetrahedron Lett.* **2003**, *44*, 4831–4834.  
doi:10.1016/S0040-4039%2803%2901137-7



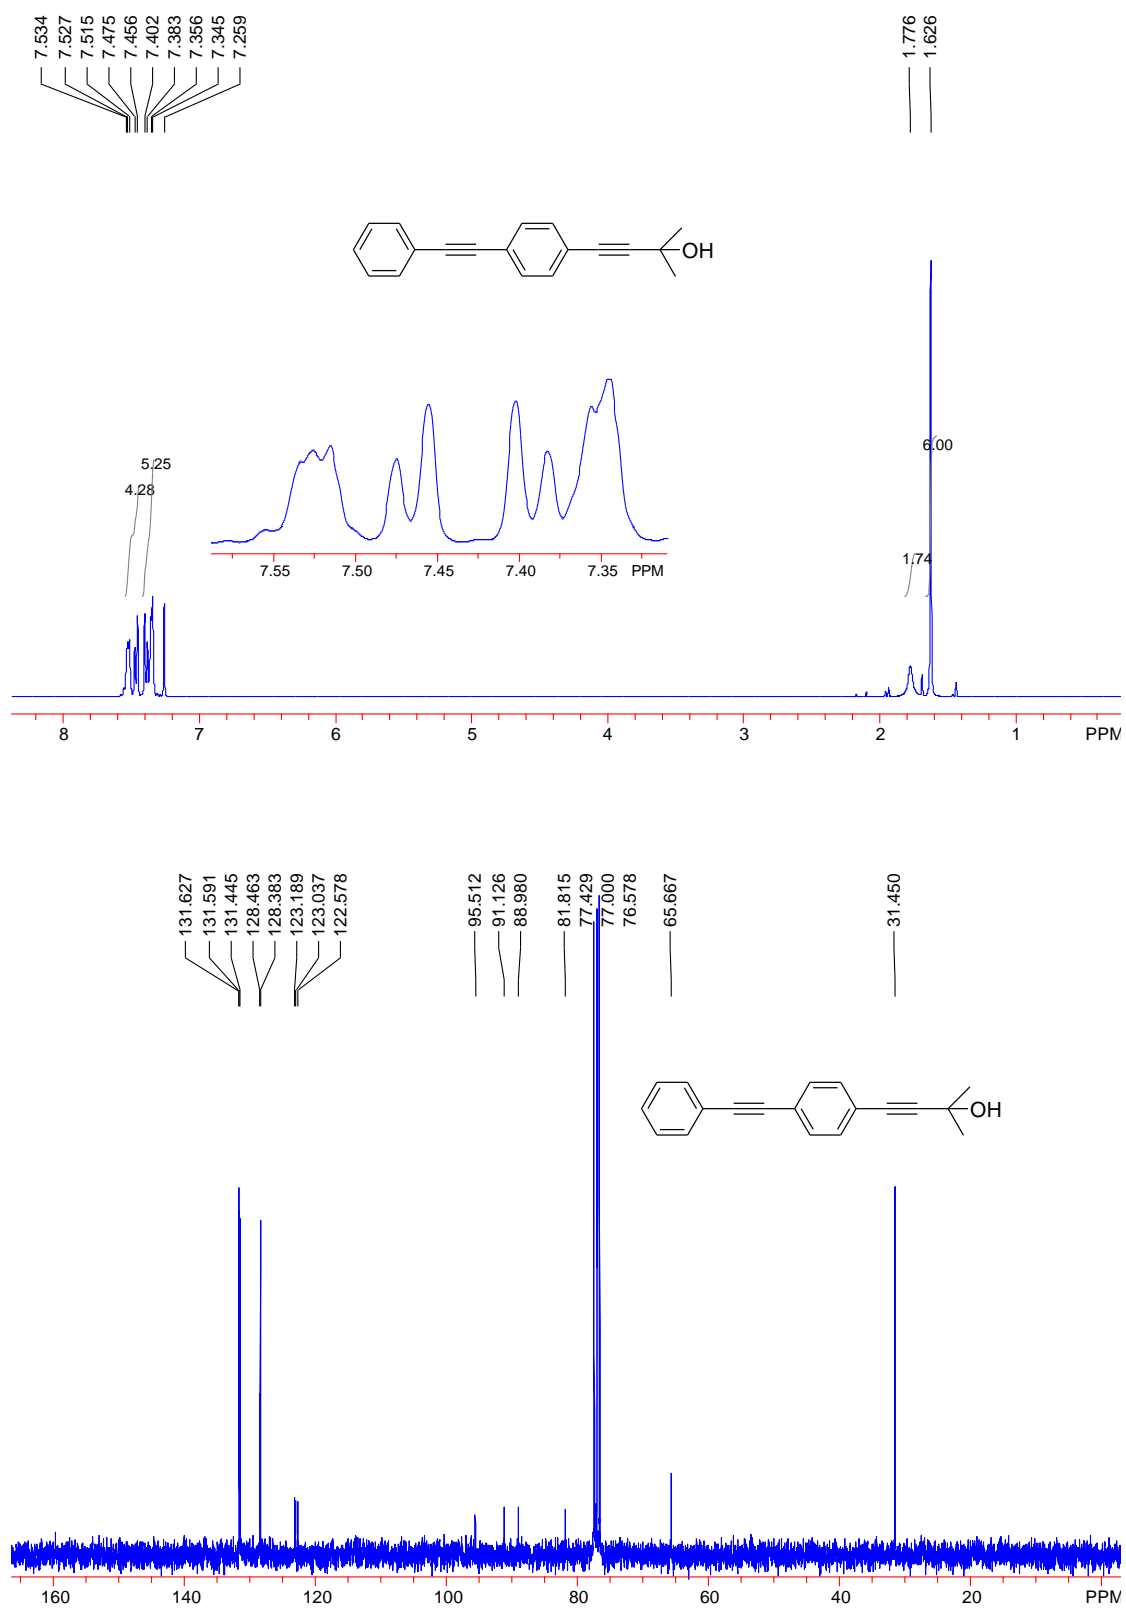

**Figure S1:** <sup>1</sup>H and <sup>13</sup>C NMR spectra of **1a**.

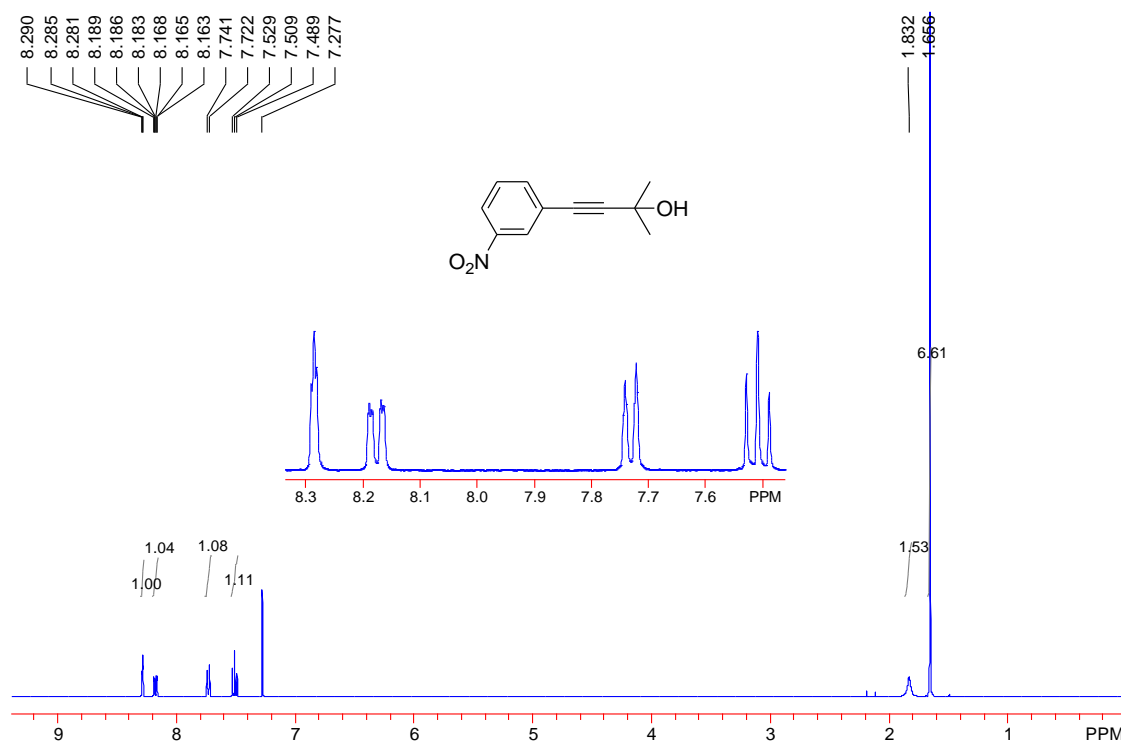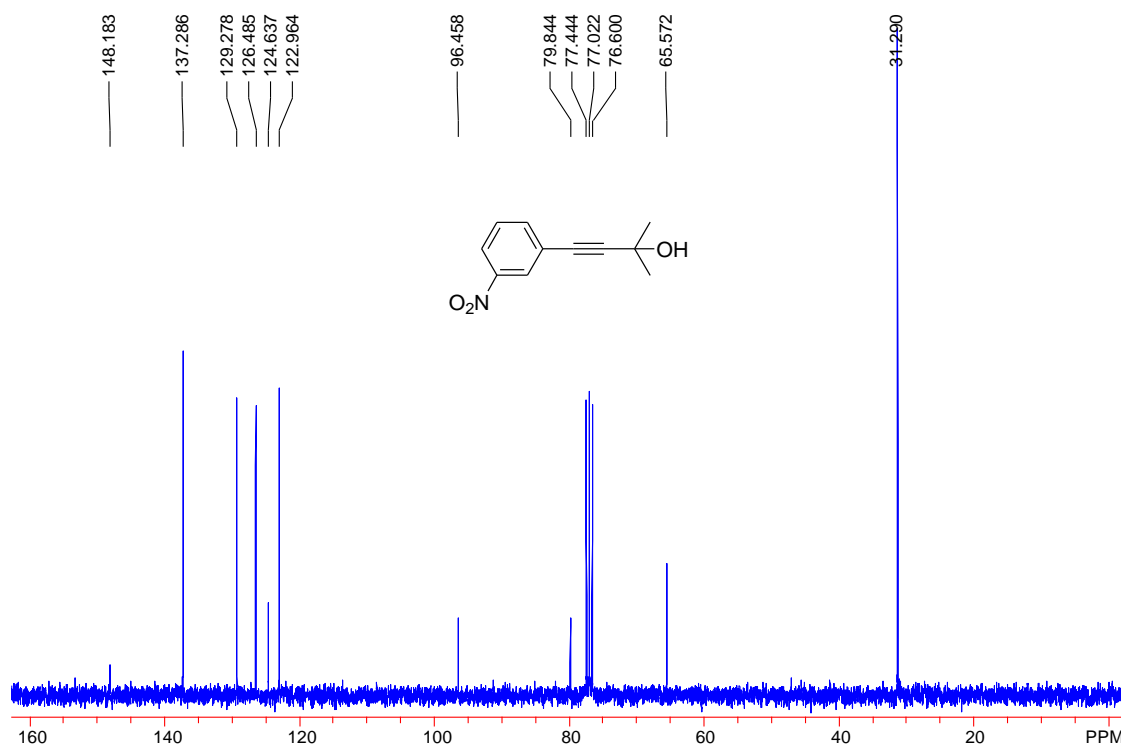

**Figure S2:** <sup>1</sup>H and <sup>13</sup>C NMR spectra of **1b**.

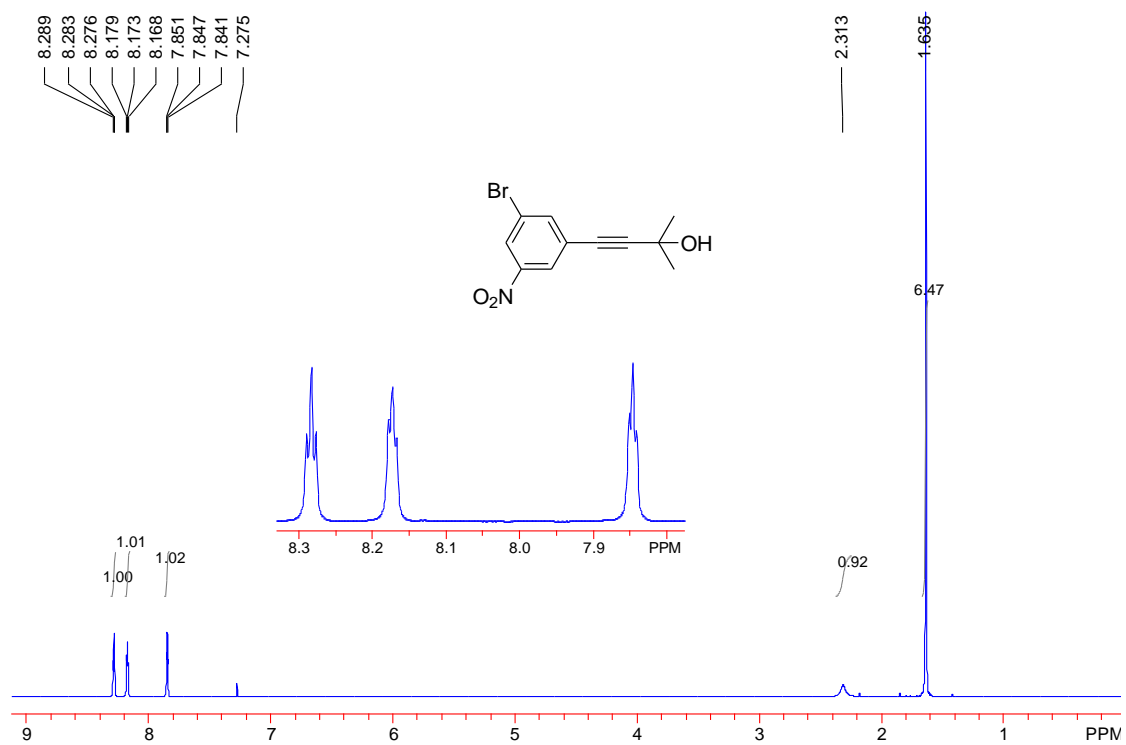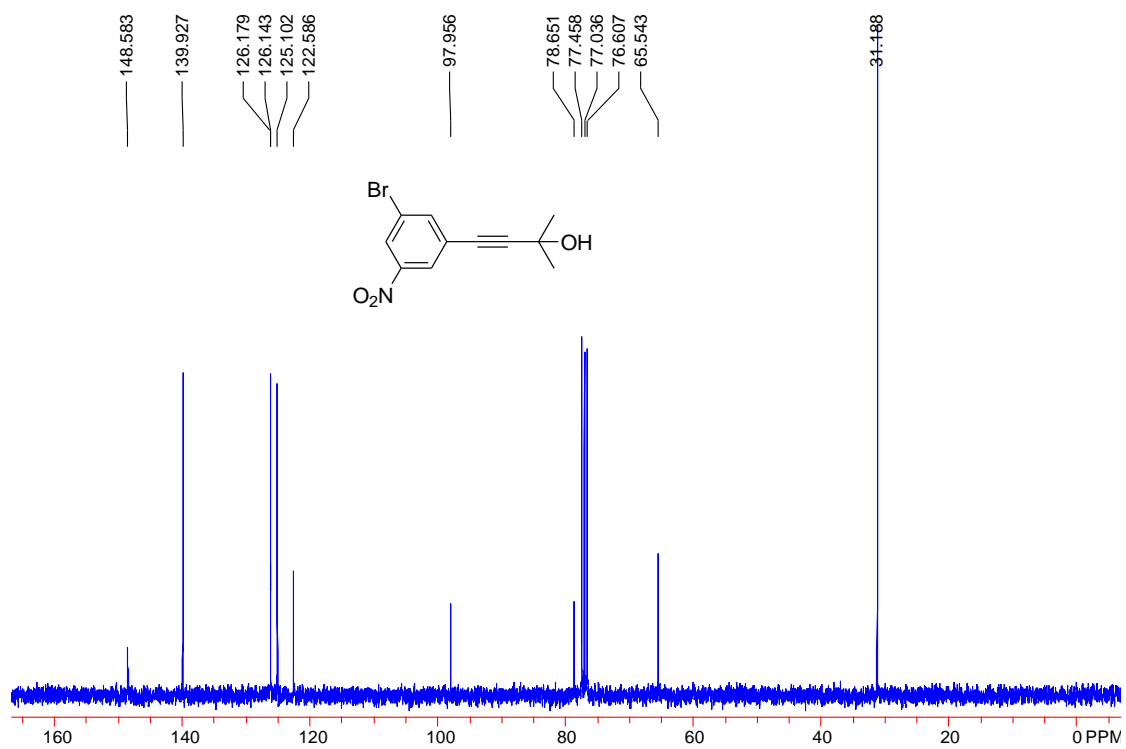

**Figure S3:** <sup>1</sup>H and <sup>13</sup>C NMR spectra of **1c**.

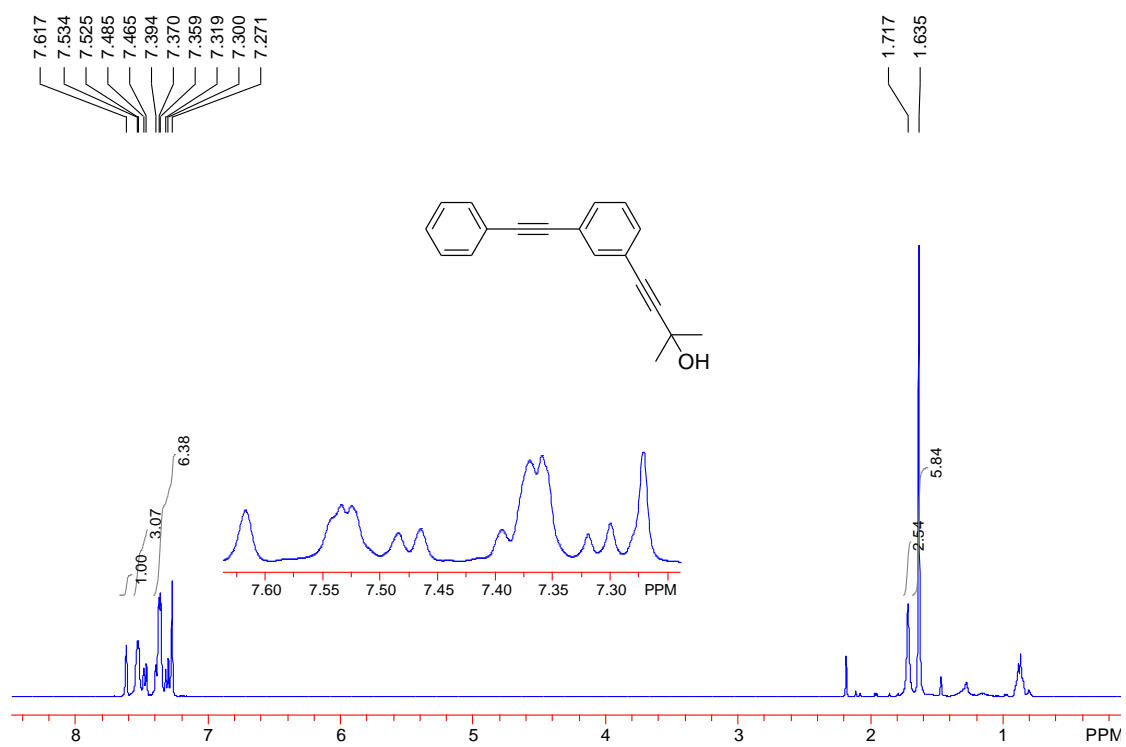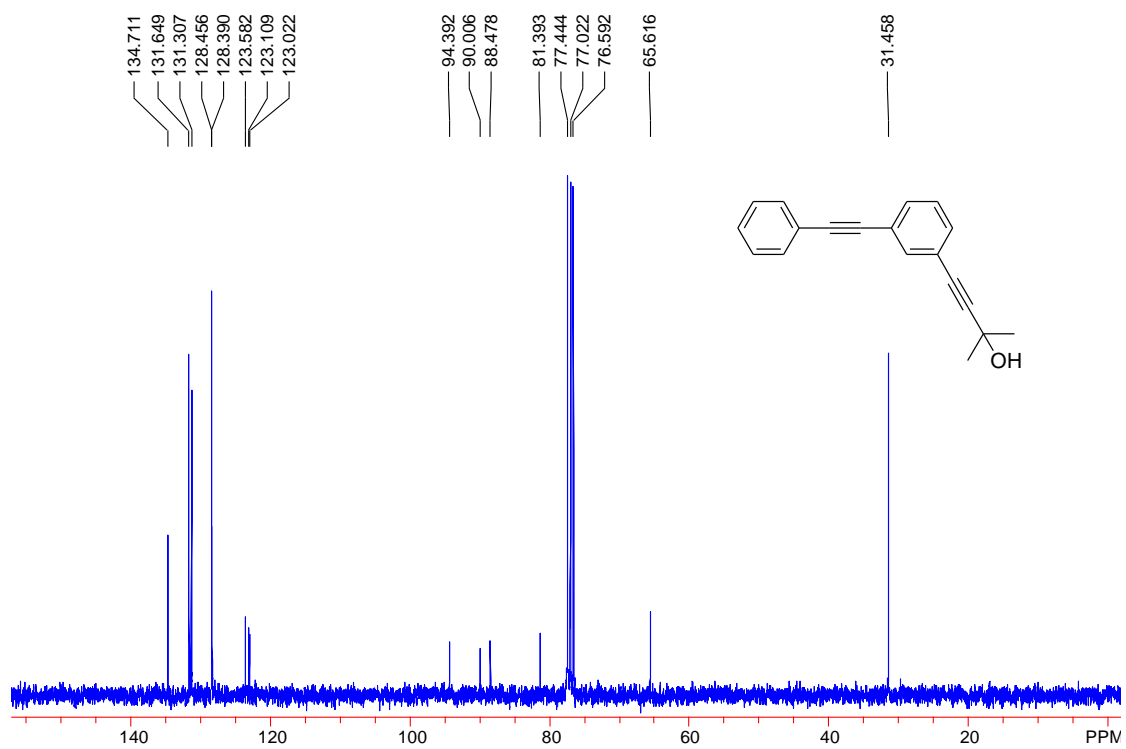

Figure S4:  $^1\text{H}$  and  $^{13}\text{C}$  NMR spectra of 1d.

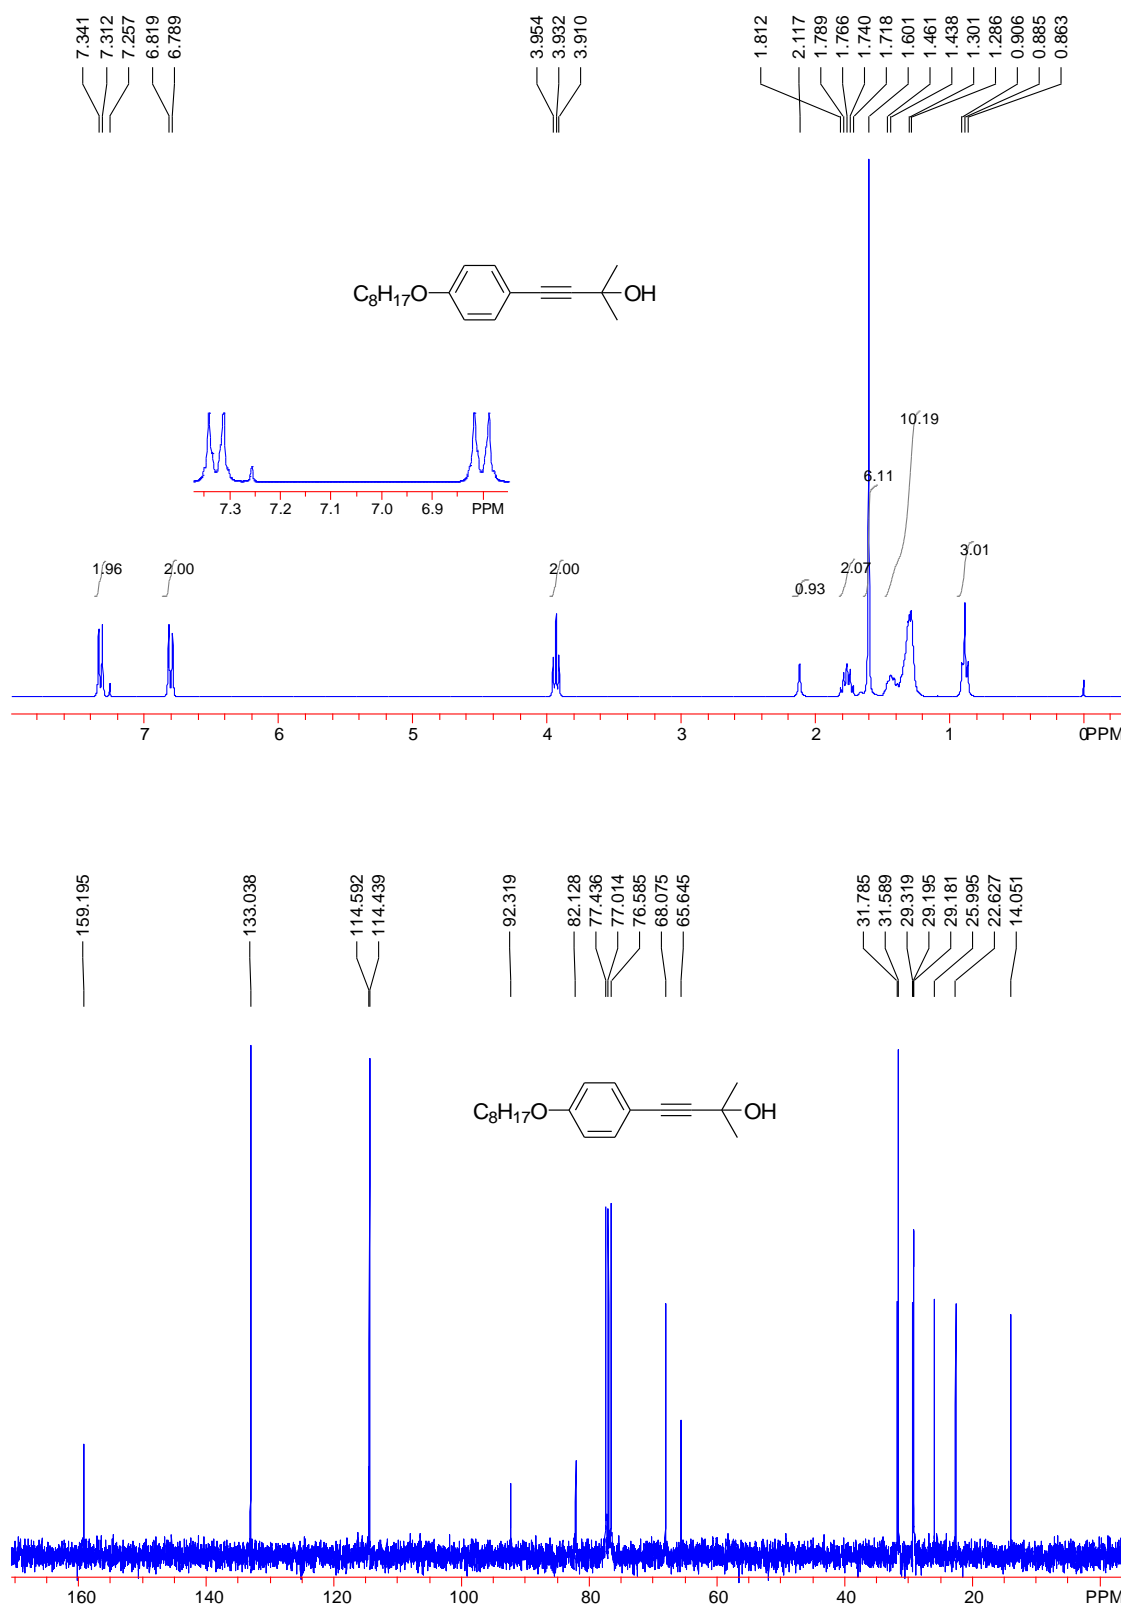

Figure S5: <sup>1</sup>H and <sup>13</sup>C NMR spectra of **1e**.

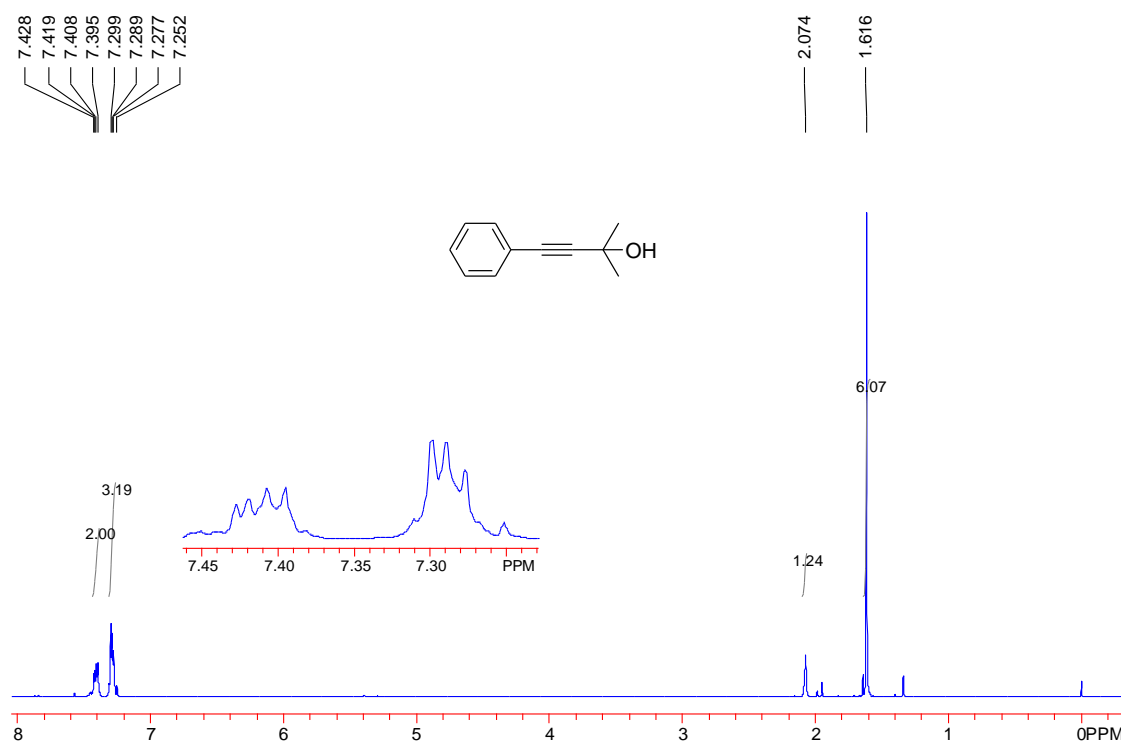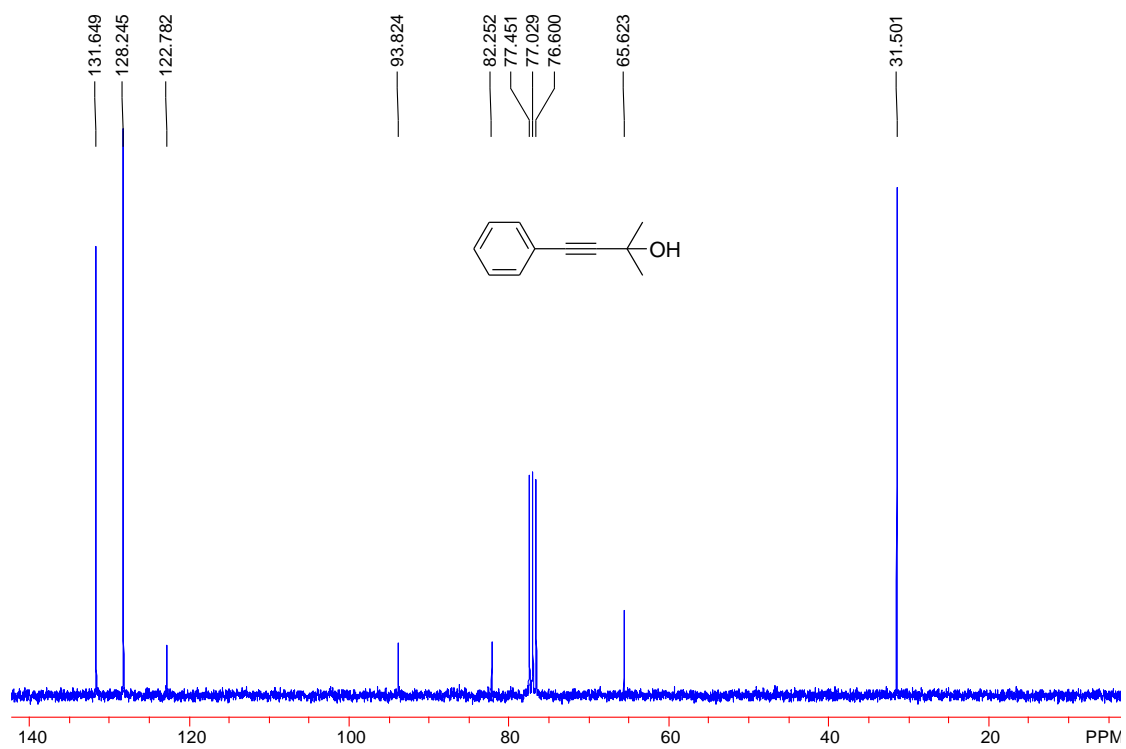

Figure S6: <sup>1</sup>H and <sup>13</sup>C NMR spectra of **1f**.

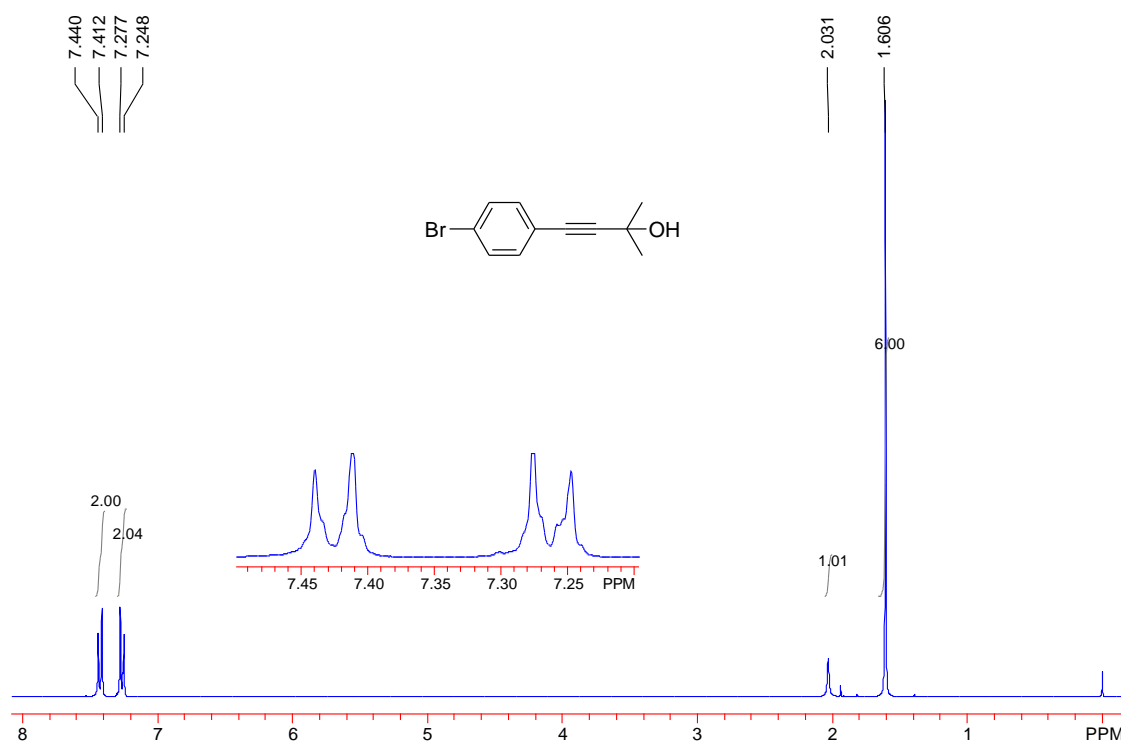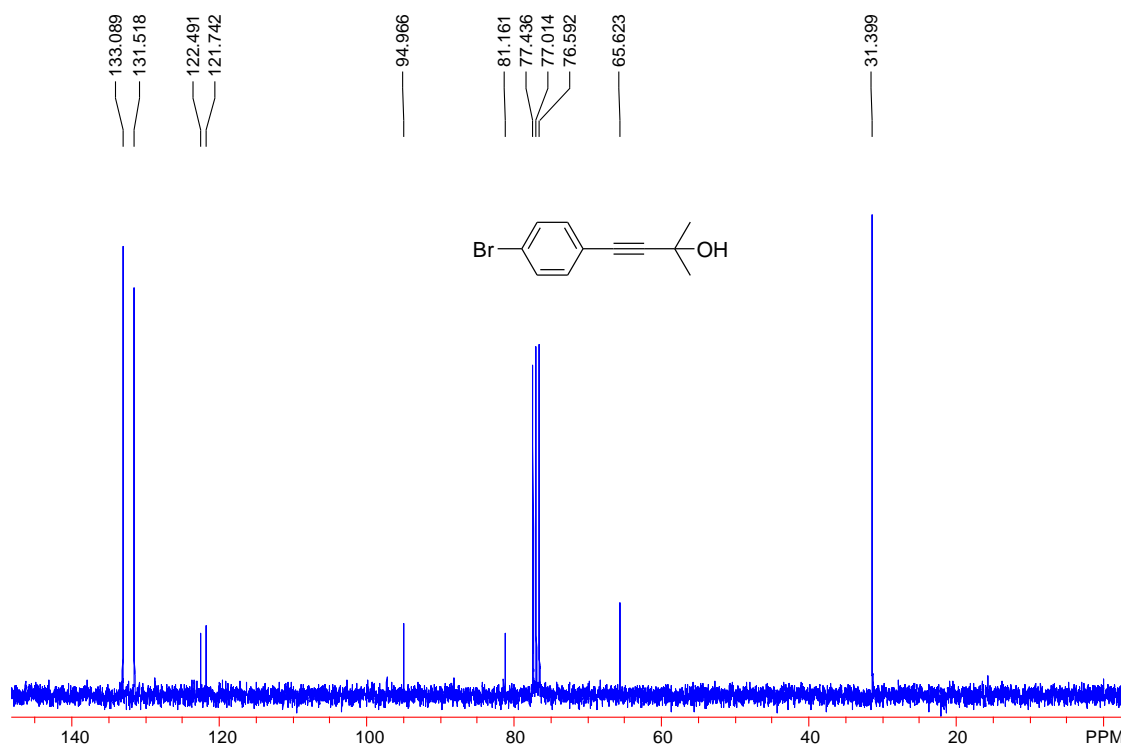

Figure S7:  $^1\text{H}$  and  $^{13}\text{C}$  NMR spectra of **1g**.

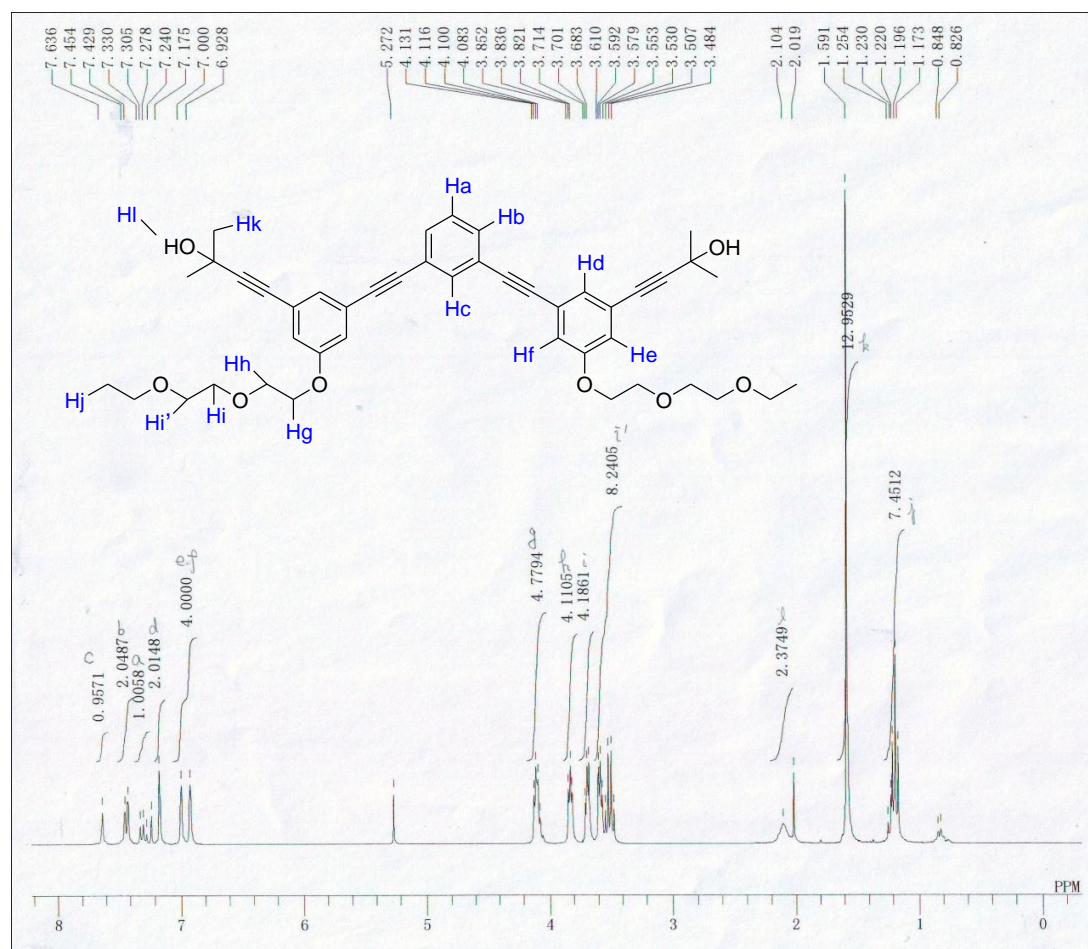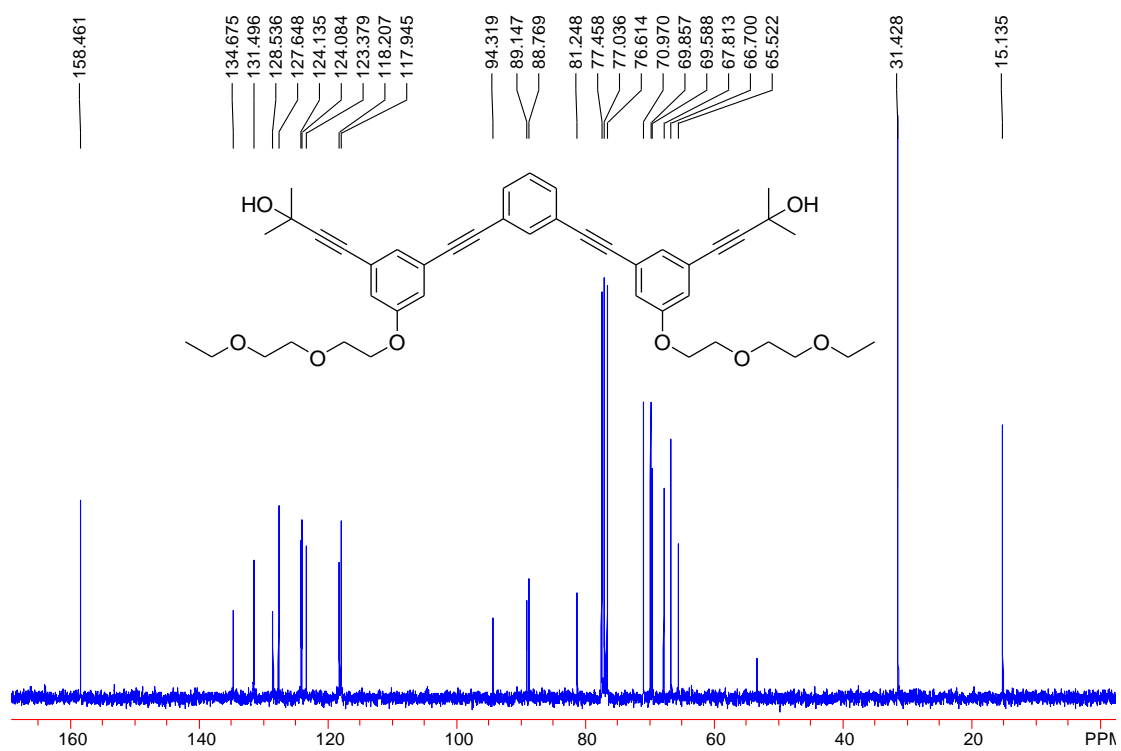

Figure S8: <sup>1</sup>H and <sup>13</sup>C NMR spectra of 1h.



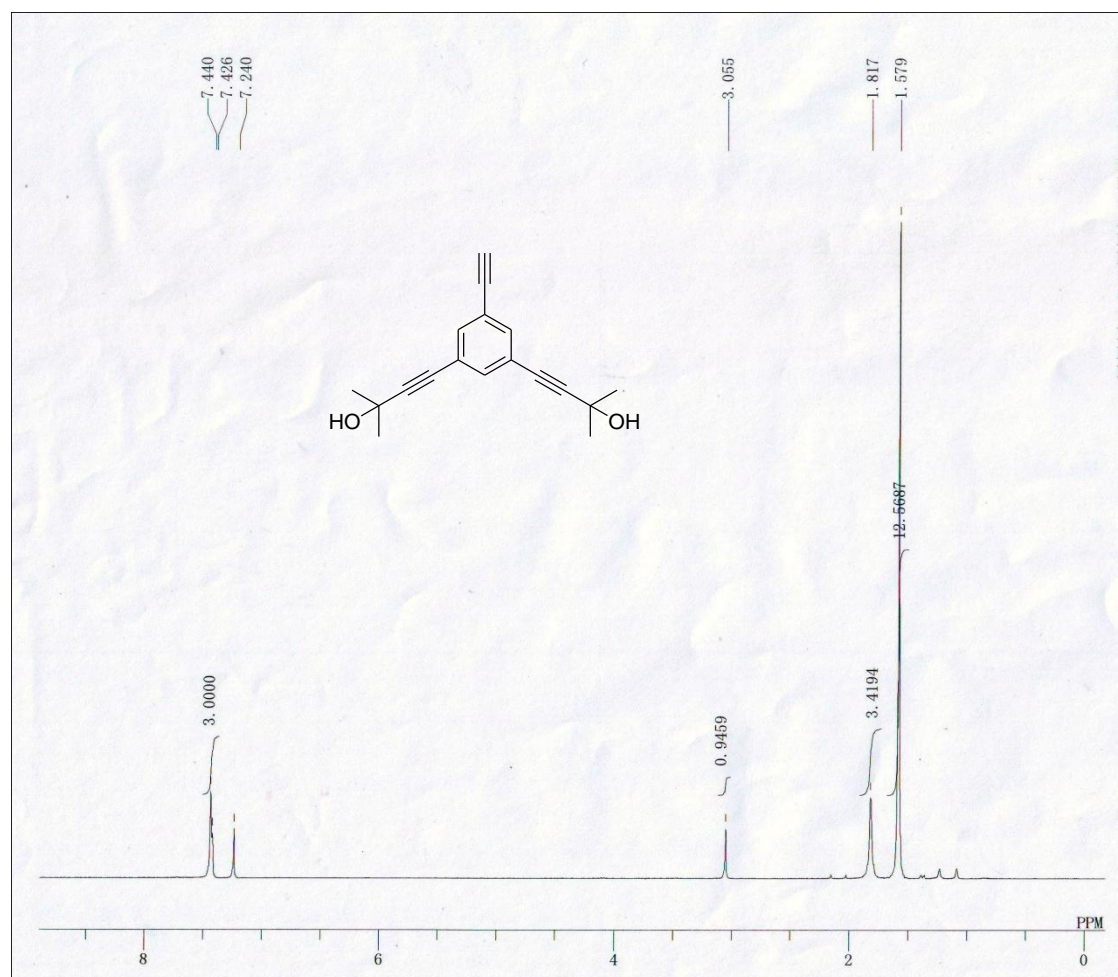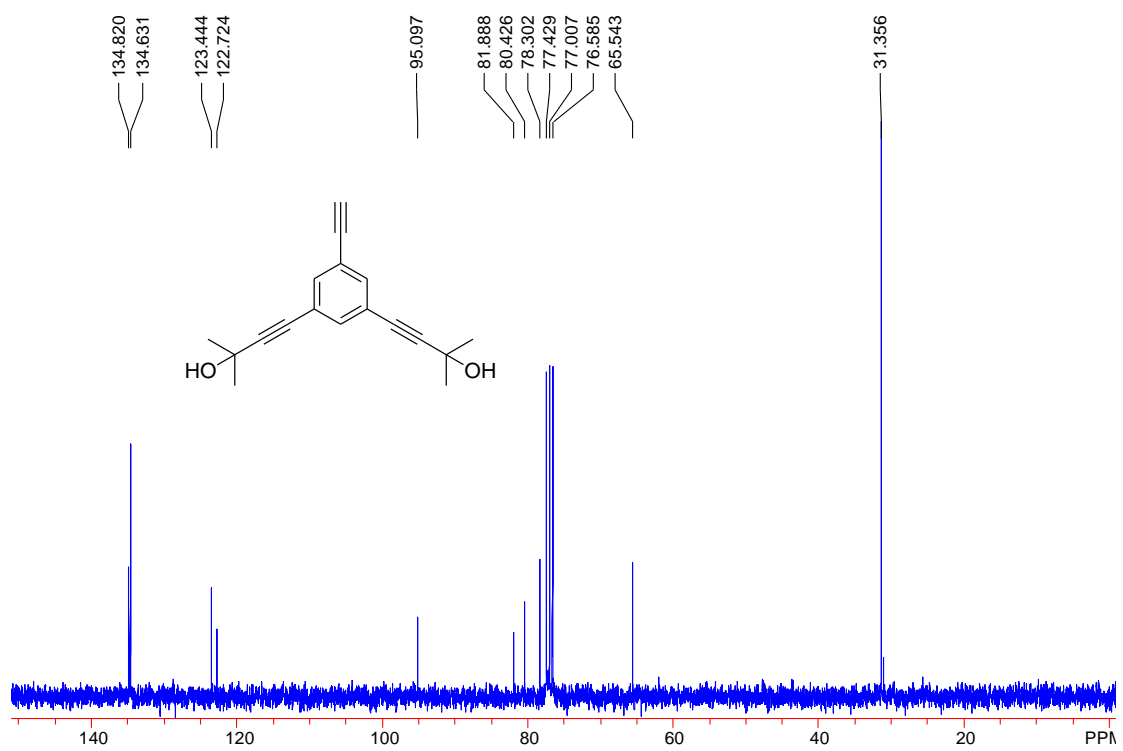

Figure S9: <sup>1</sup>H and <sup>13</sup>C NMR spectra of **1i**.

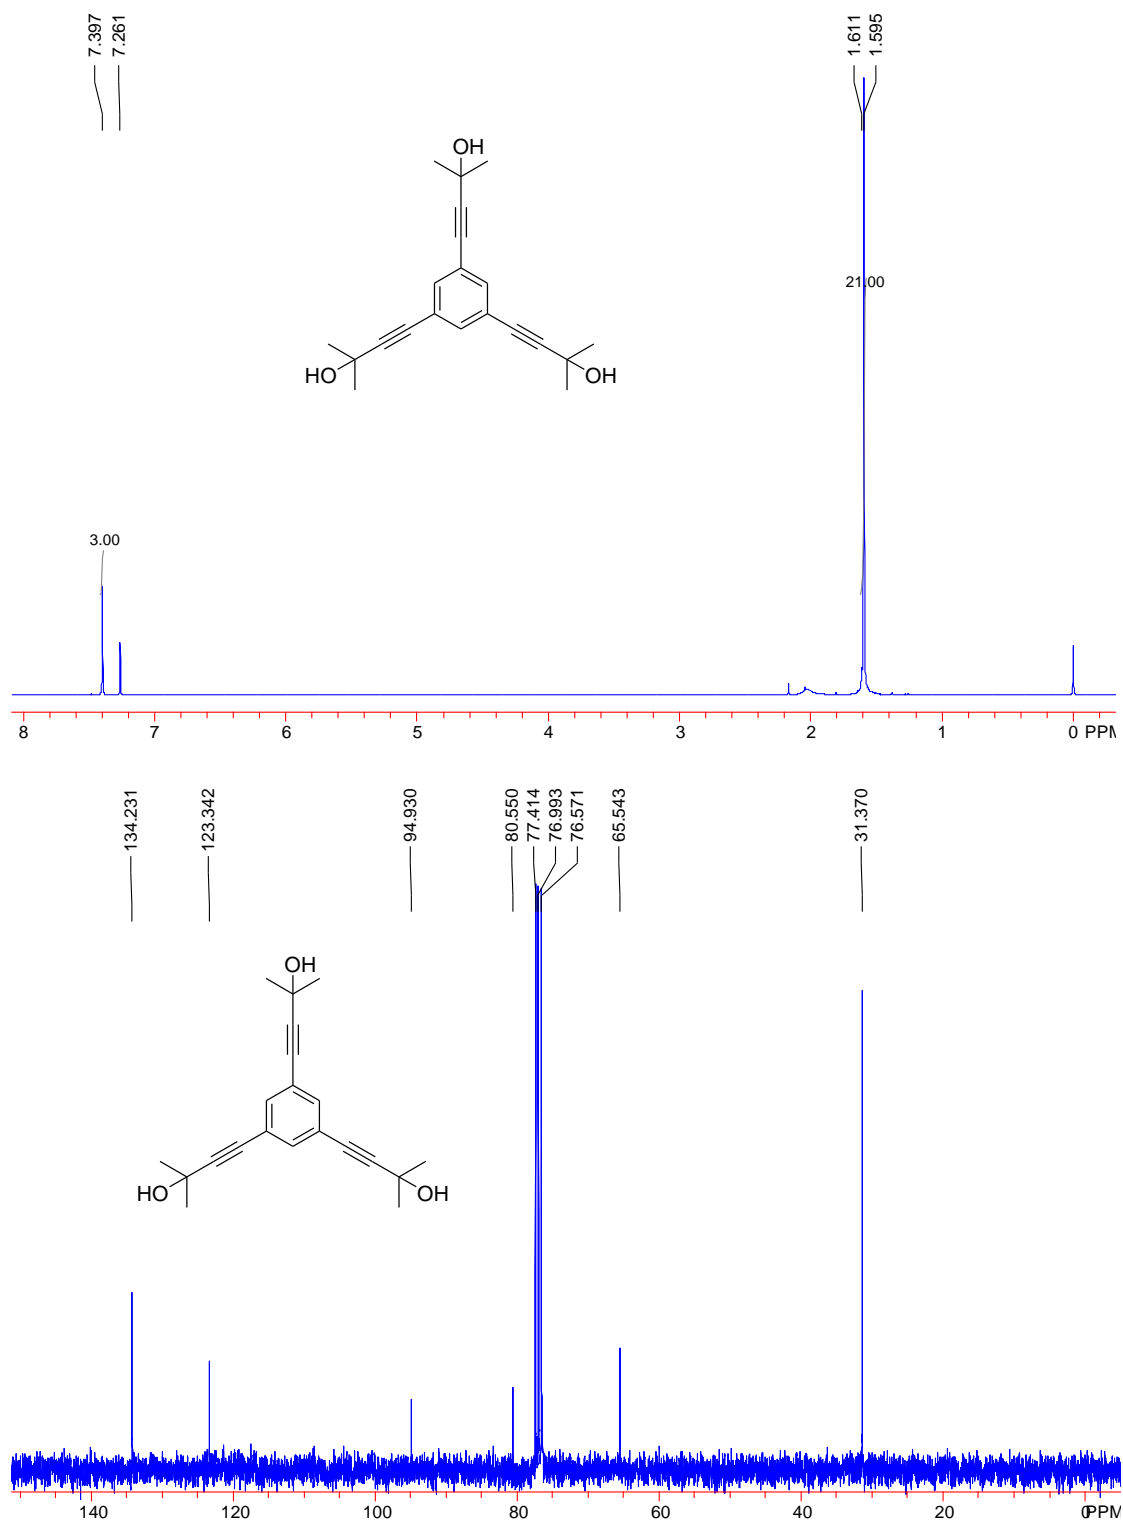

**Figure S10:**  $^1\text{H}$  and  $^{13}\text{C}$  NMR spectra of **1j**.

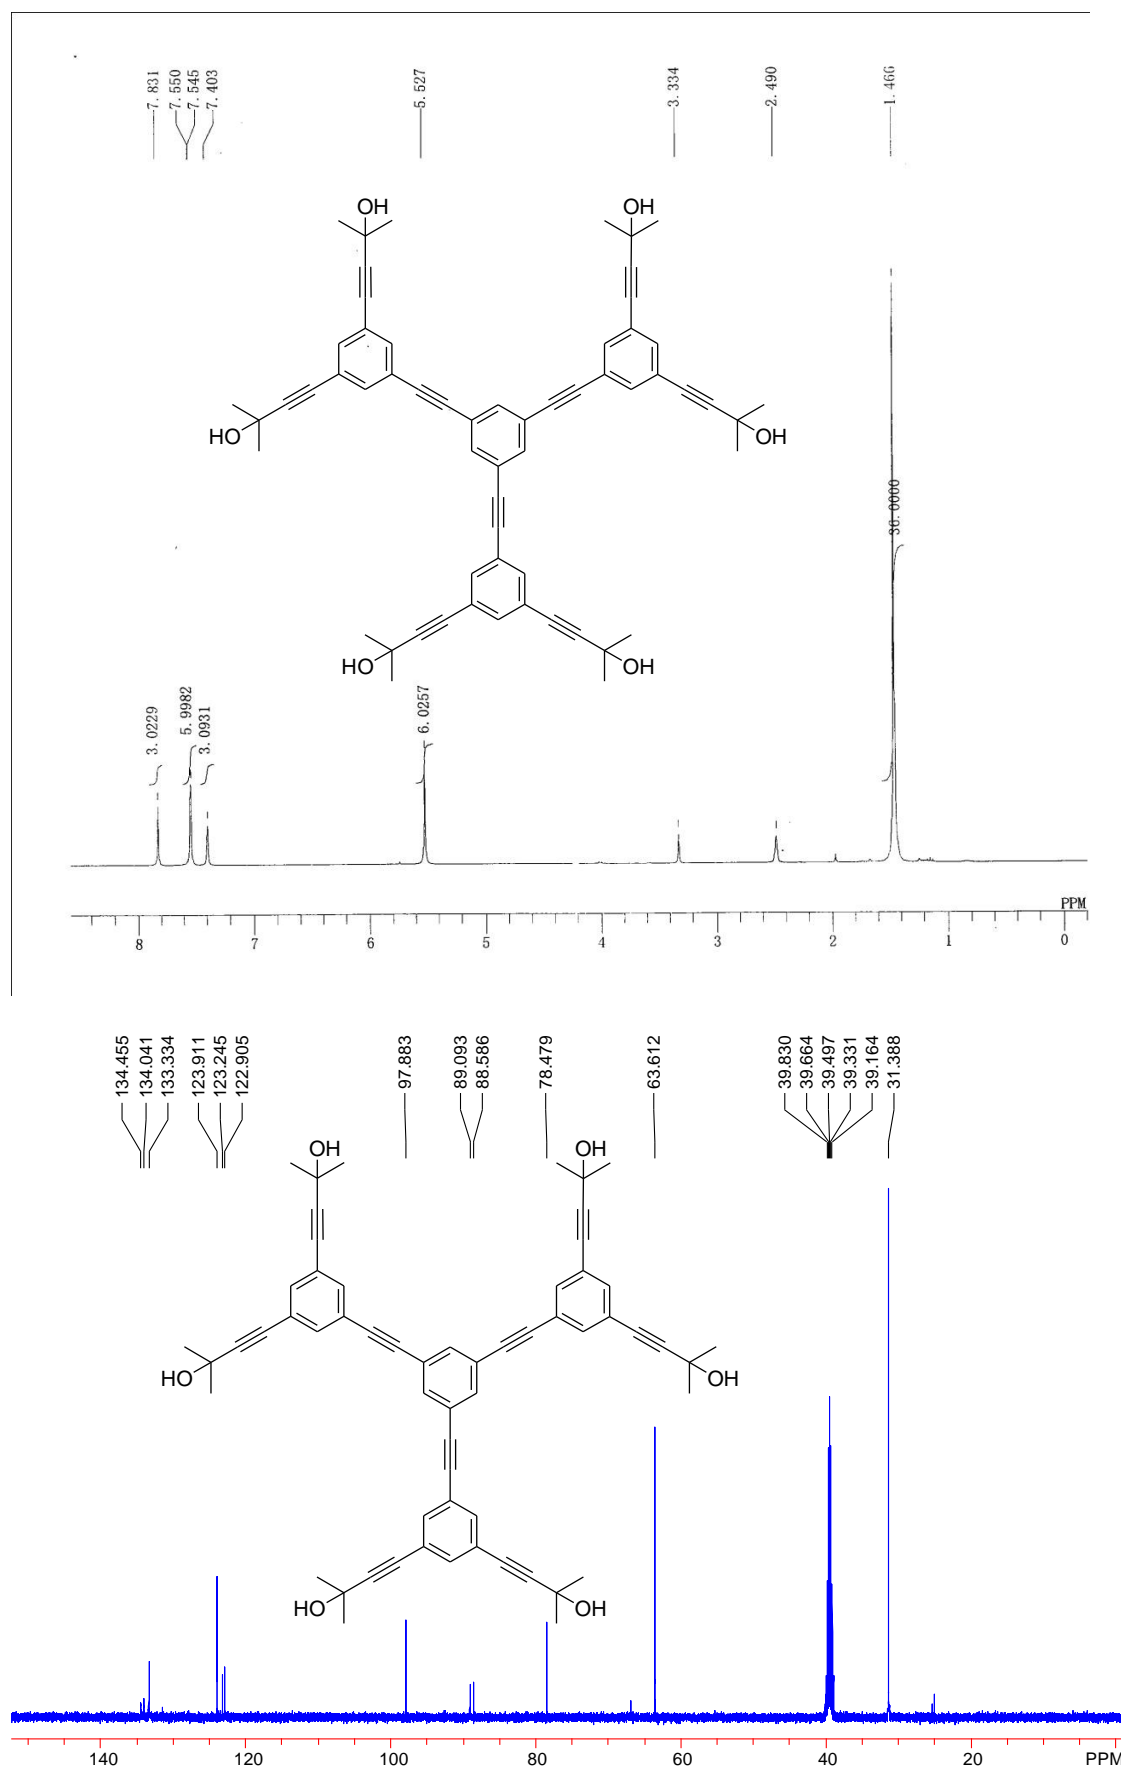

Figure S11: <sup>1</sup>H and <sup>13</sup>C NMR spectra of 1k.

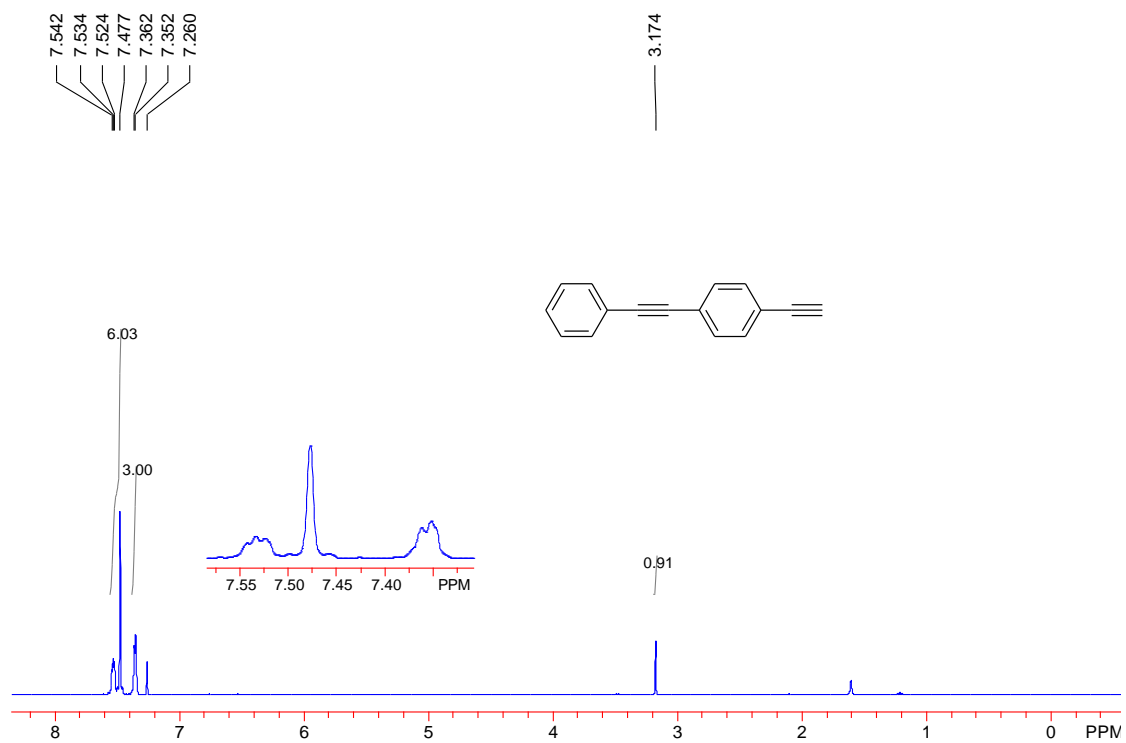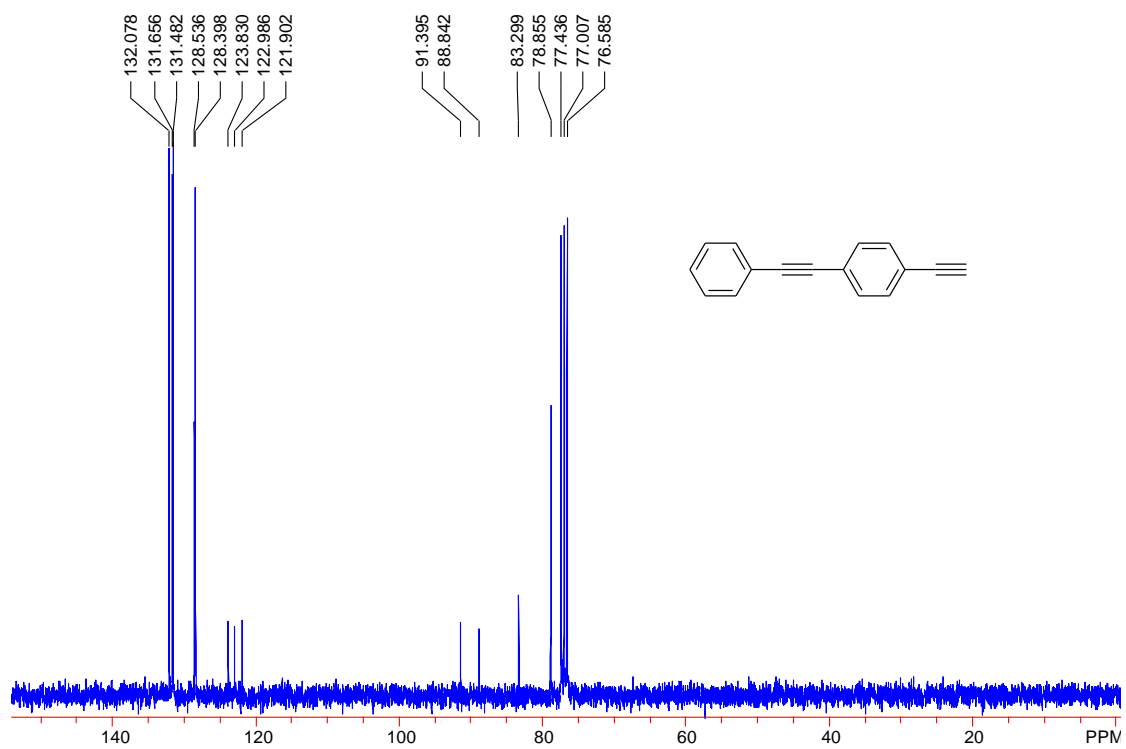

Figure S12: <sup>1</sup>H and <sup>13</sup>C NMR spectra of 2a.

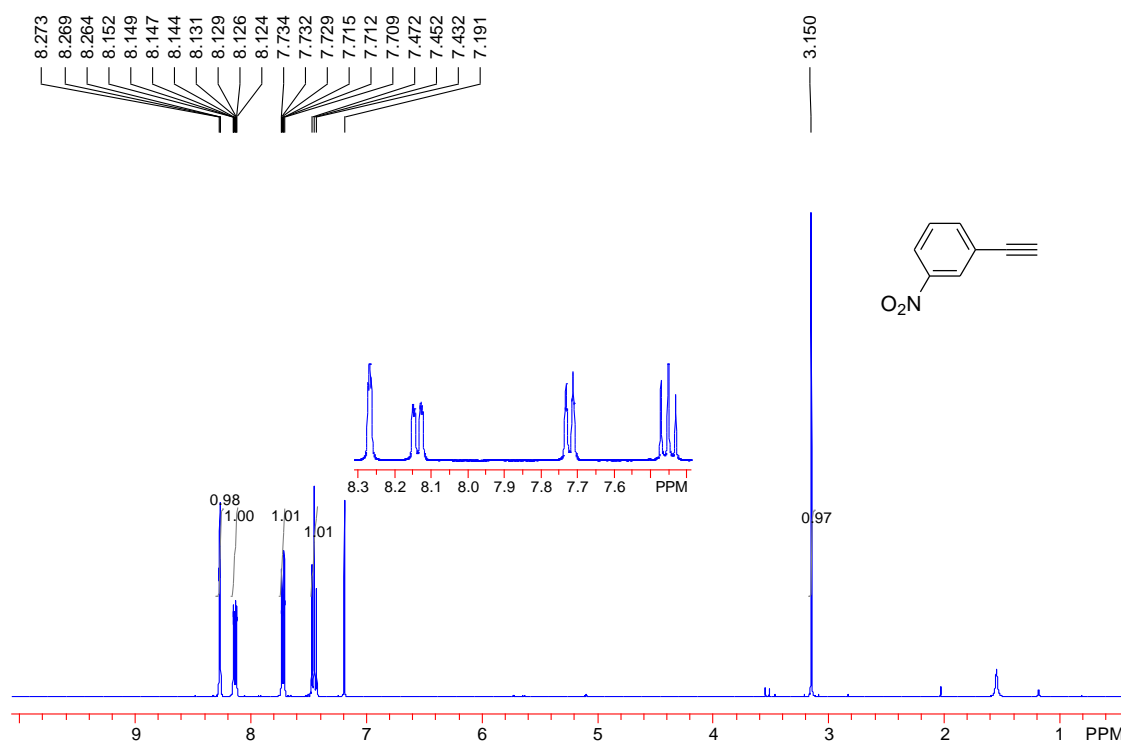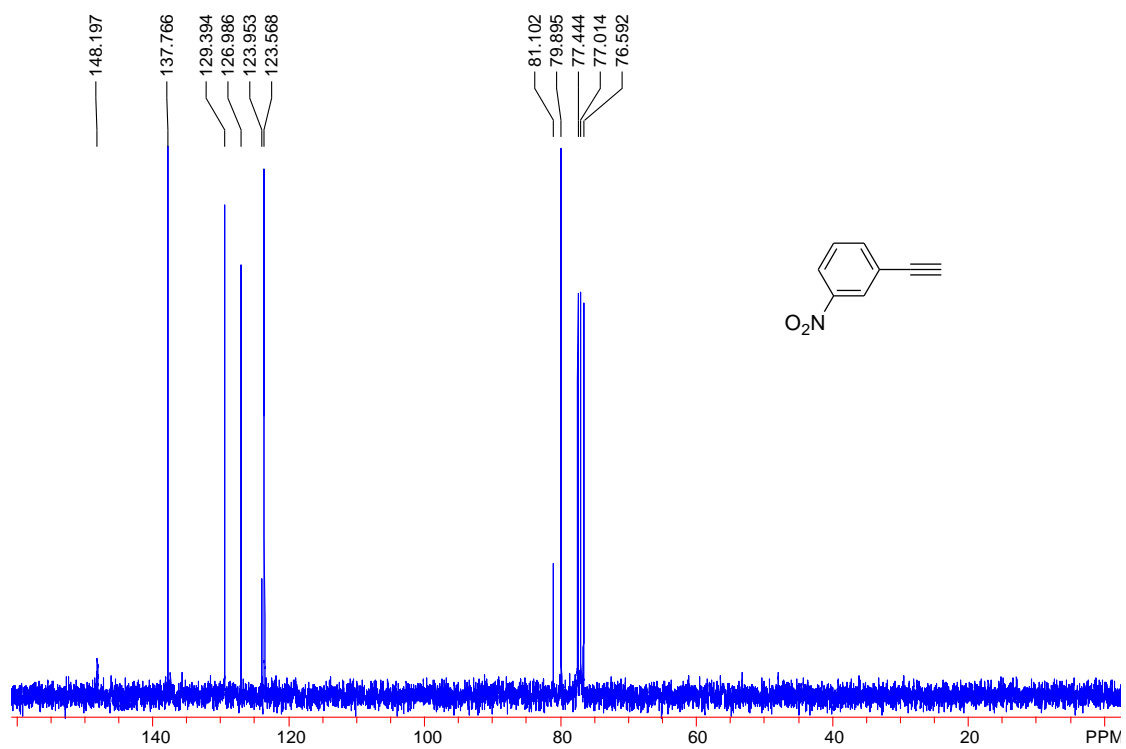

Figure S13: <sup>1</sup>H and <sup>13</sup>C NMR spectra of **2b**.

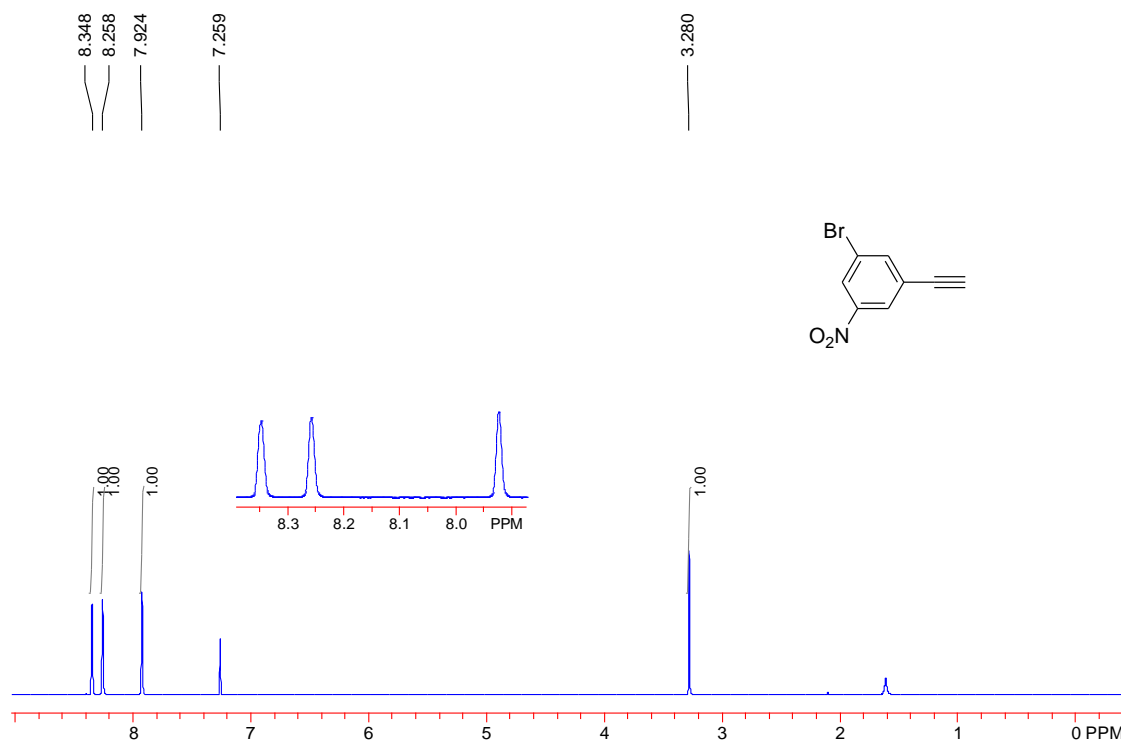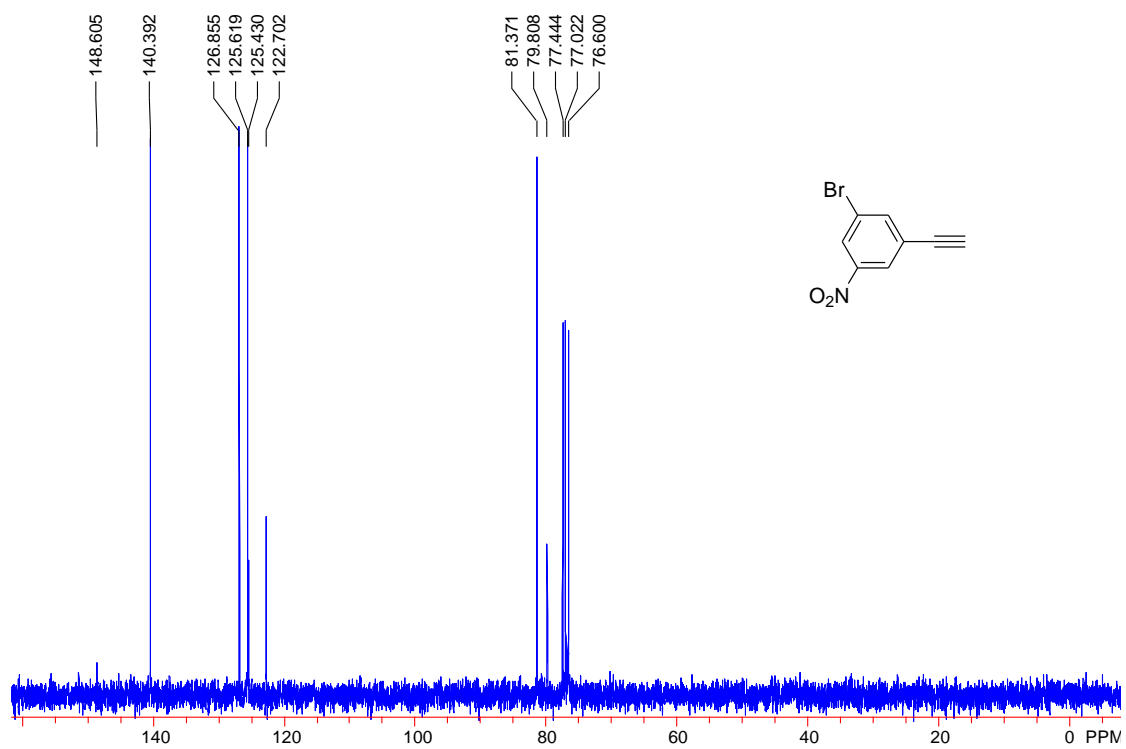

Figure S14:  $^1\text{H}$  and  $^{13}\text{C}$  NMR spectra of 2c.

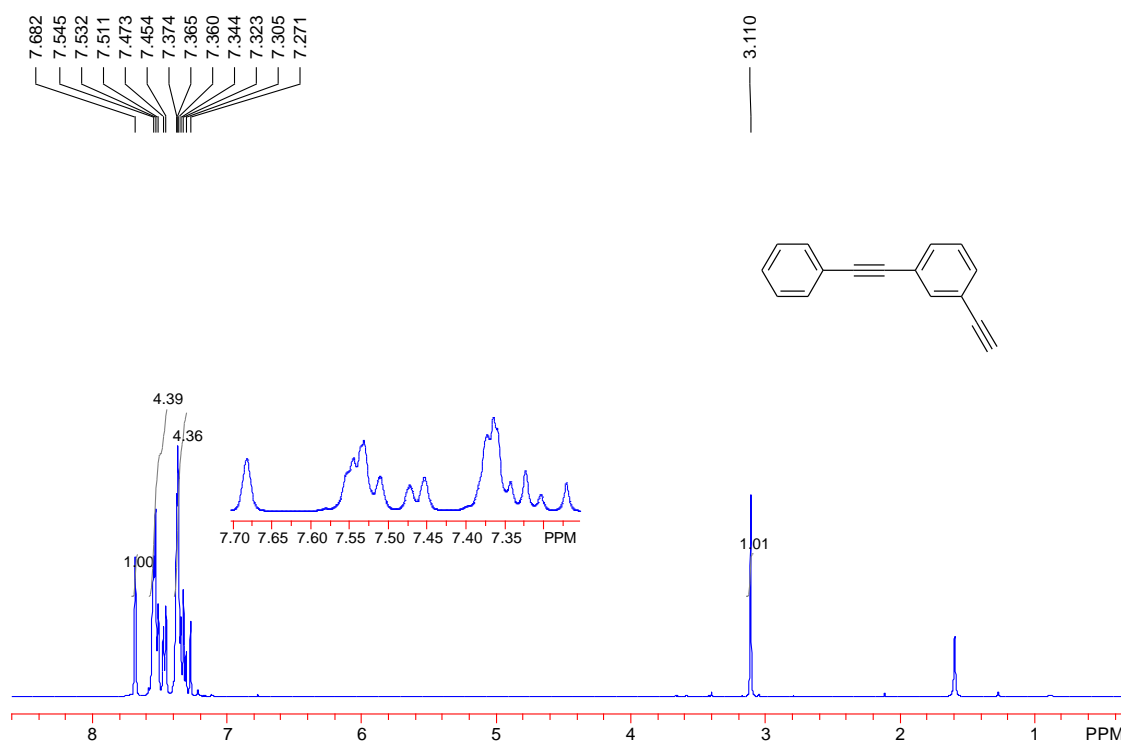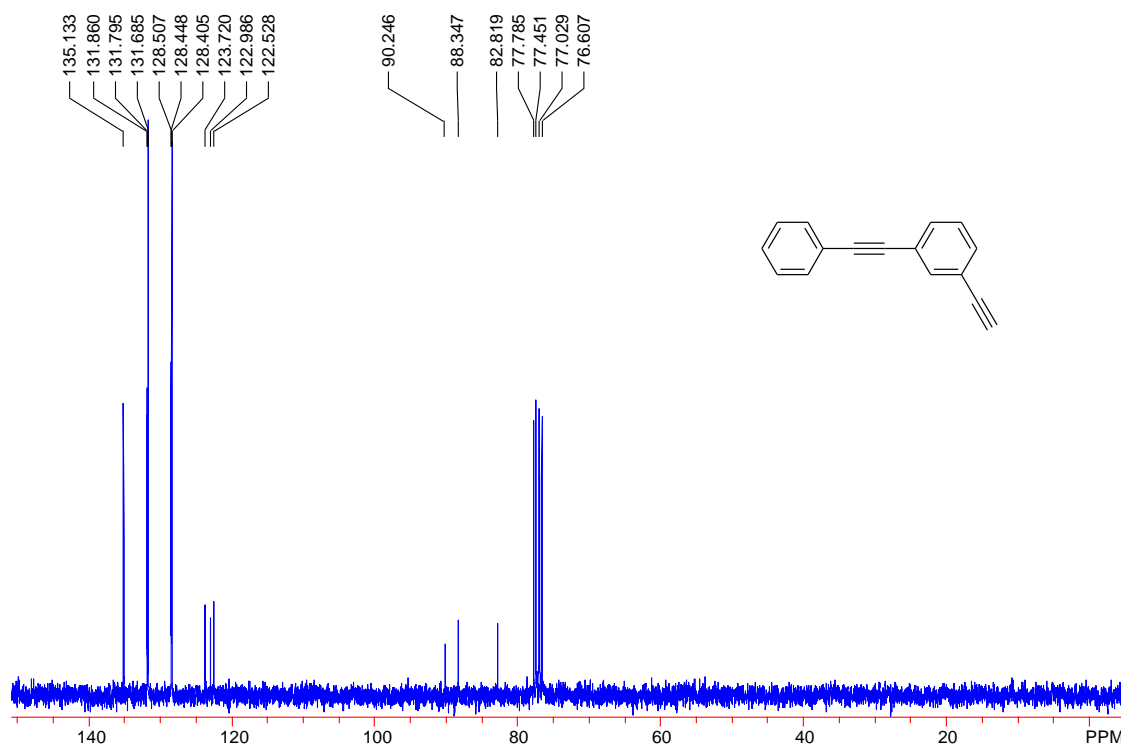

Figure S15:  $^1\text{H}$  and  $^{13}\text{C}$  NMR spectra of 2d.

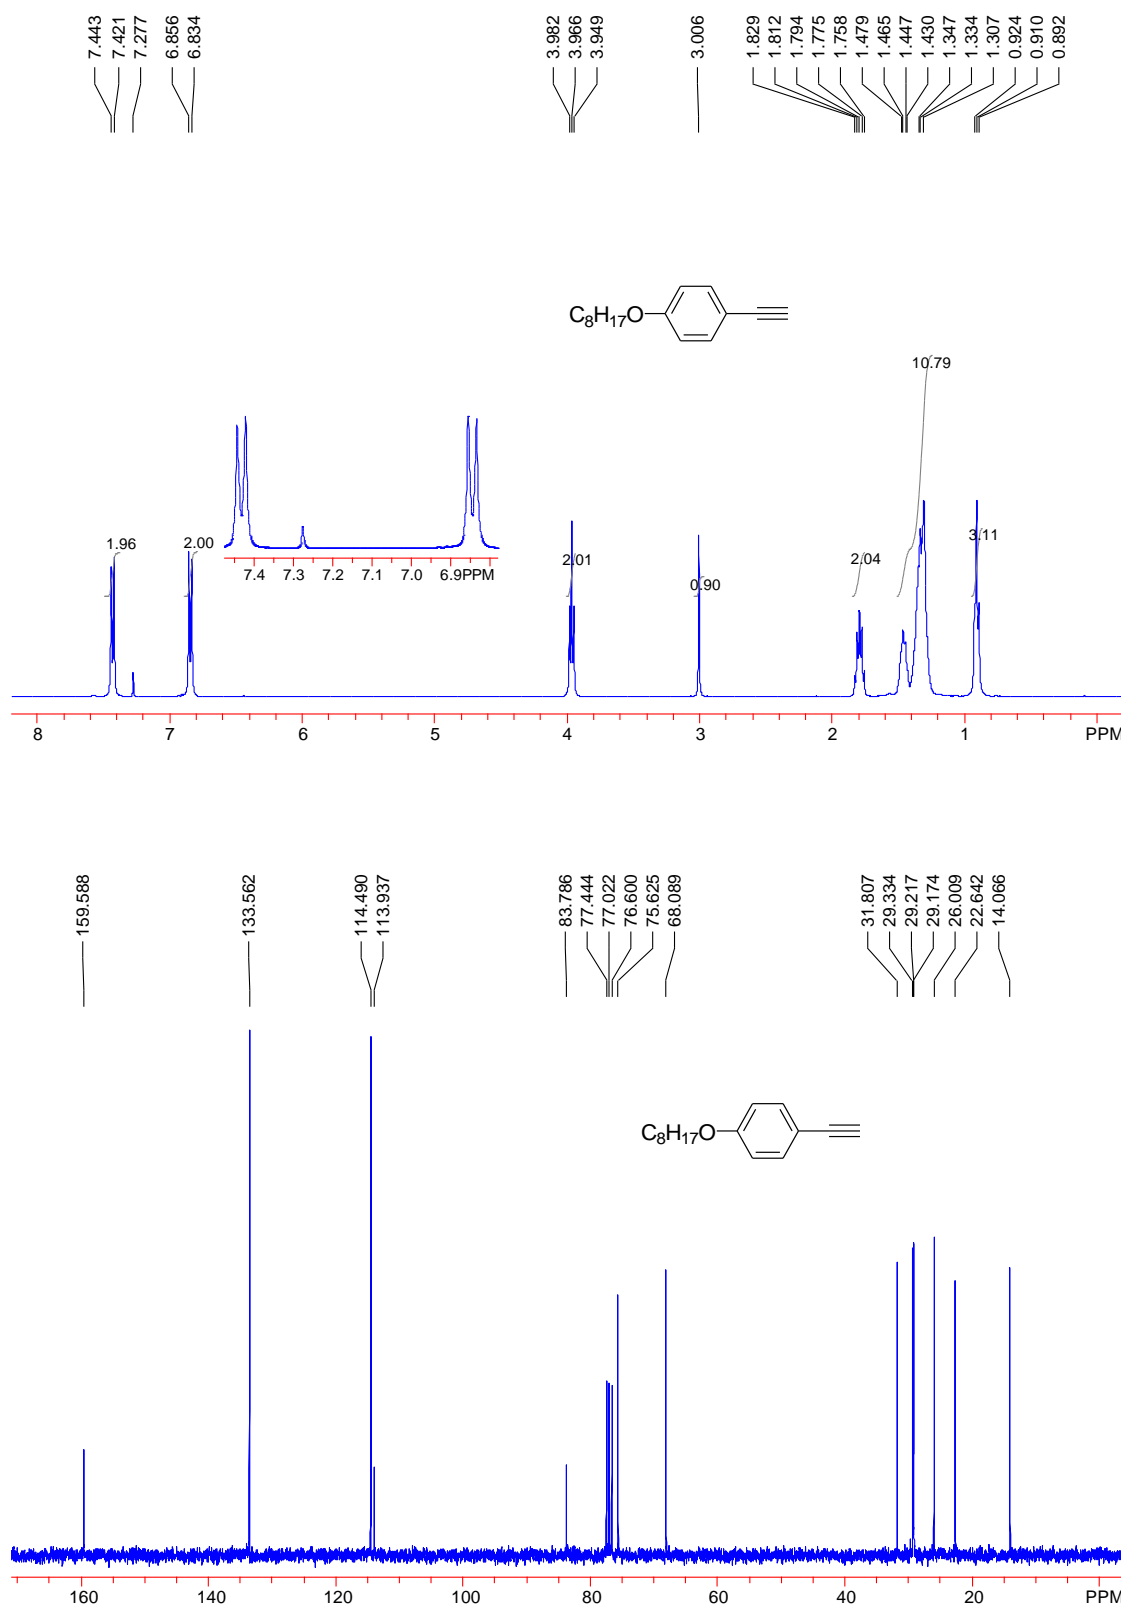

**Figure S16:** <sup>1</sup>H and <sup>13</sup>C NMR spectra of **2e**.



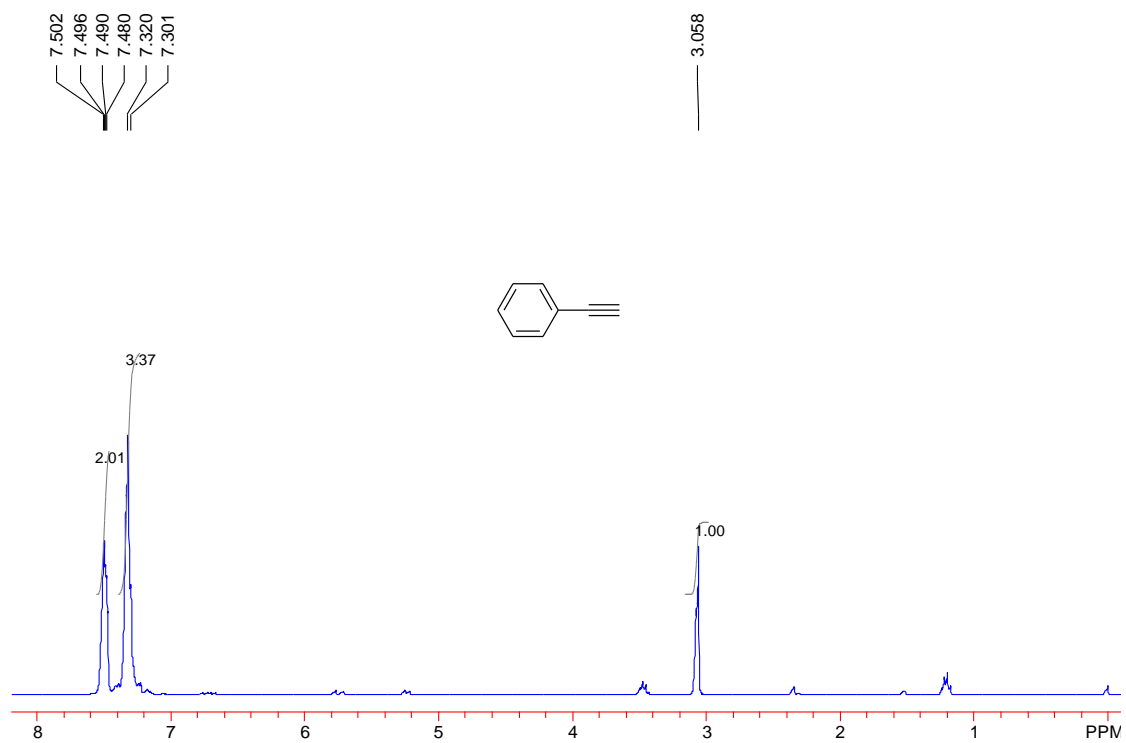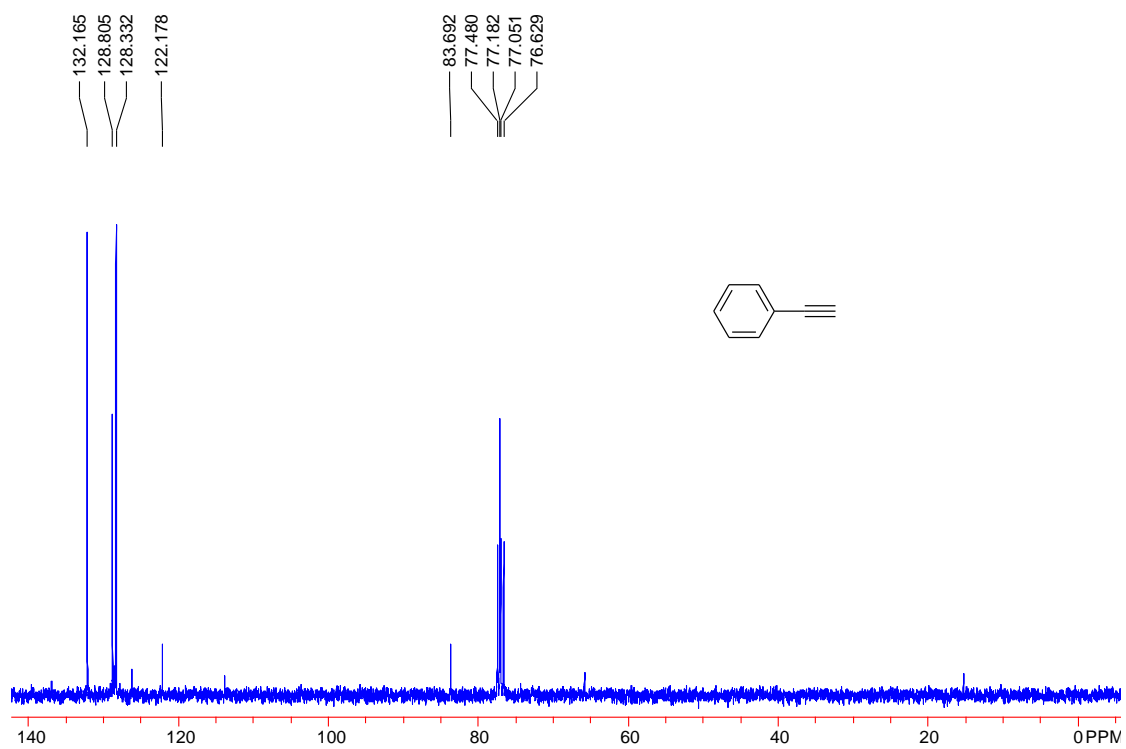

Figure S17: <sup>1</sup>H and <sup>13</sup>C NMR spectra of 2f.

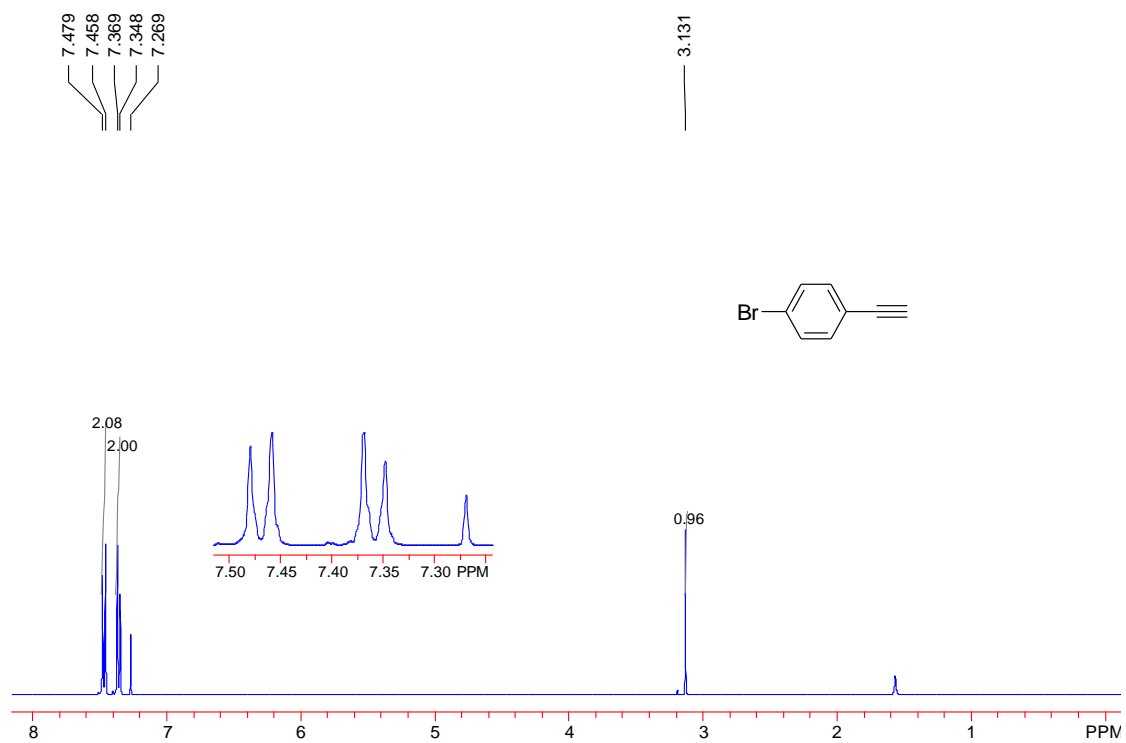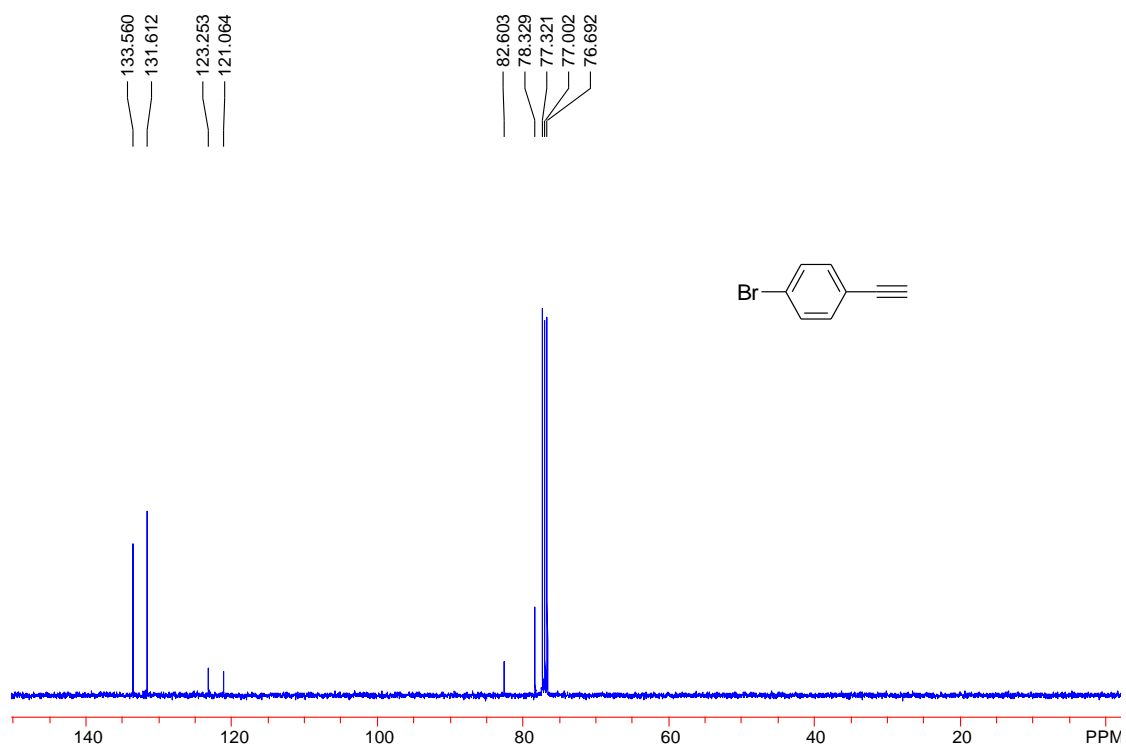

Figure S18:  $^1\text{H}$  and  $^{13}\text{C}$  NMR spectra of **2g**.



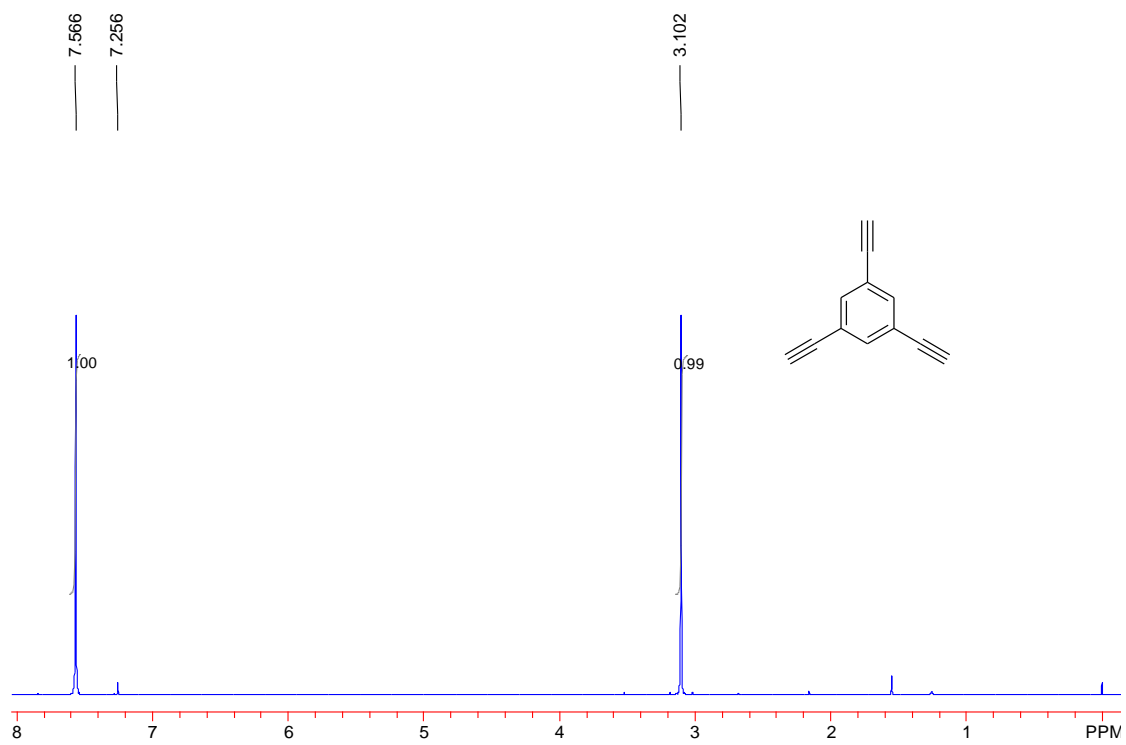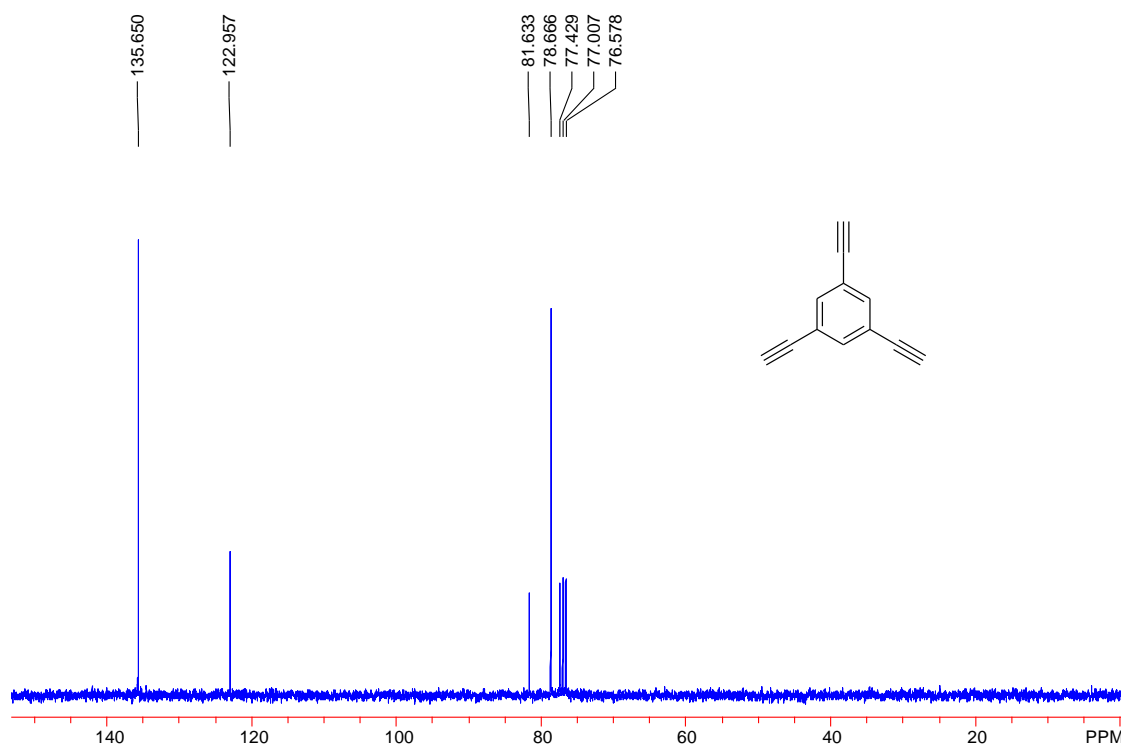

**Figure S20:** <sup>1</sup>H and <sup>13</sup>C NMR spectra of **2i**.

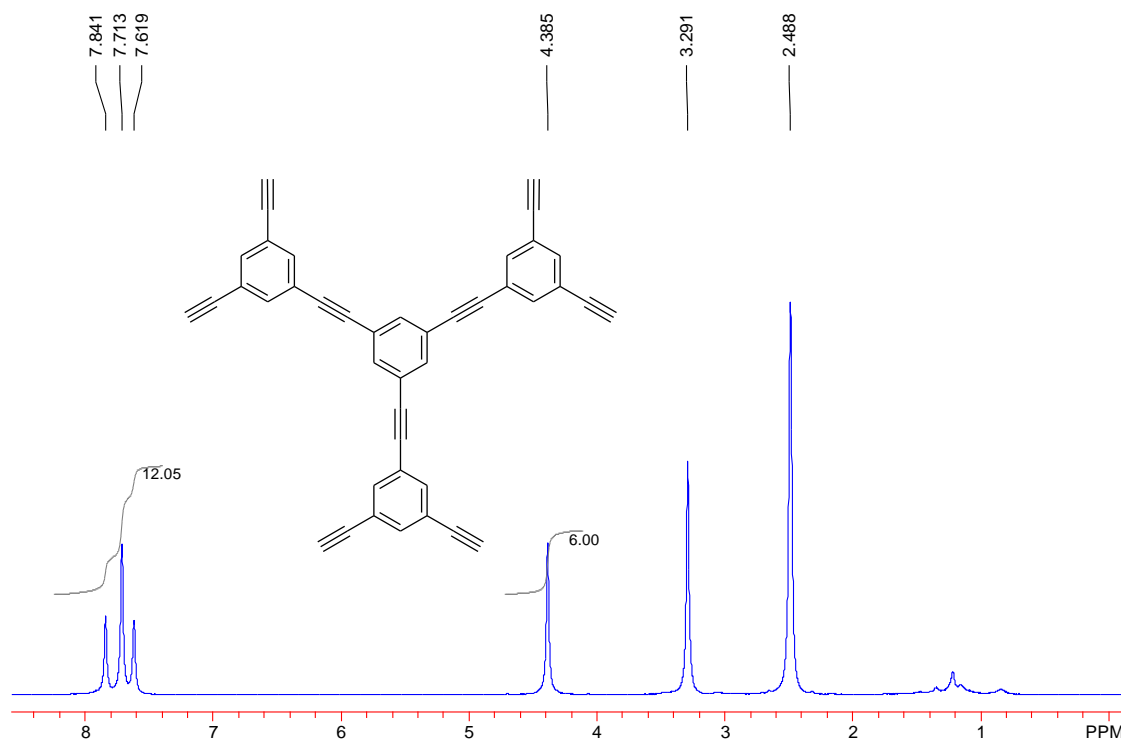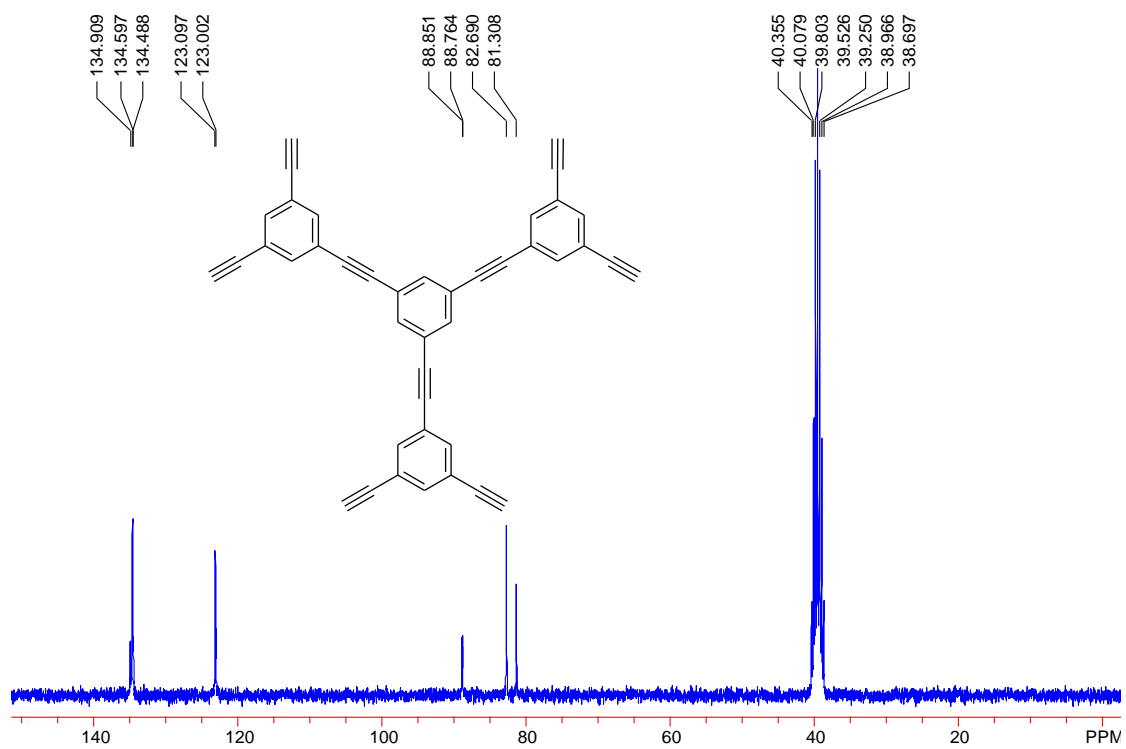

Figure S21: <sup>1</sup>H and <sup>13</sup>C NMR spectra of **2k**.
